# Supplementary material for: An overview and methodological assessment of systematic reviews and meta-analyses of enhanced recovery programmes in colorectal surgery
Source: PubMed Central journal article supplement — BMJ Open. 2014 May 30;4(5):e005014. doi: 10.1136/bmjopen-2014-005014 (PMC4039862; doi:10.1136/bmjopen-2014-005014), 2014-05-30
Supplement: bmjopen-2014-005014.draft_revisions.pdf [file bmjopen-2014-005014.draft_revisions.pdf]

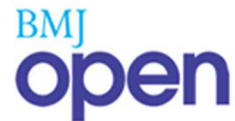

**Effect of enhanced recovery programmes on length of hospital stay in colorectal surgery: an overview and methodological assessment of systematic reviews**

|                                 |                                                                                                                                                                                                                                                                                                                                                                                                                                                                                                                                                       |
|---------------------------------|-------------------------------------------------------------------------------------------------------------------------------------------------------------------------------------------------------------------------------------------------------------------------------------------------------------------------------------------------------------------------------------------------------------------------------------------------------------------------------------------------------------------------------------------------------|
| Journal:                        | <i>BMJ Open</i>                                                                                                                                                                                                                                                                                                                                                                                                                                                                                                                                       |
| Manuscript ID:                  | bmjopen-2014-005014                                                                                                                                                                                                                                                                                                                                                                                                                                                                                                                                   |
| Article Type:                   | Research                                                                                                                                                                                                                                                                                                                                                                                                                                                                                                                                              |
| Date Submitted by the Author:   | 07-Feb-2014                                                                                                                                                                                                                                                                                                                                                                                                                                                                                                                                           |
| Complete List of Authors:       | Chambers, Duncan; University of York, Centre for Reviews and Dissemination<br>Paton, Fiona; University of York, Centre for Reviews and Dissemination<br>Eastwood, Alison; University of York, Centre for Reviews and Dissemination<br>Wilson, Paul; University of York, Centre for Reviews and Dissemination<br>Craig, Dawn; University of York, Centre for Reviews and Dissemination<br>Fox, Dave; University of York, Centre for Reviews and Dissemination<br>Jayne, David; Leeds Teaching Hospitals,<br>McGinnes, Erika; Leeds Teaching Hospitals, |
| <b>Primary Subject Heading</b>: | Surgery                                                                                                                                                                                                                                                                                                                                                                                                                                                                                                                                               |
| Secondary Subject Heading:      | Research methods                                                                                                                                                                                                                                                                                                                                                                                                                                                                                                                                      |
| Keywords:                       | SURGERY, Enhanced recovery after surgery, Fast track                                                                                                                                                                                                                                                                                                                                                                                                                                                                                                  |
|                                 |                                                                                                                                                                                                                                                                                                                                                                                                                                                                                                                                                       |

SCHOLARONE™  
Manuscripts

Only

1  
2  
3 **Effect of enhanced recovery programmes on length of hospital stay in colorectal**  
4 **surgery: an overview and methodological assessment of systematic reviews**  
5  
6  
7

8 Duncan Chambers, Fiona Paton, Alison Eastwood, Paul Wilson, Dawn Craig, Dave Fox,  
9 David Jayne, Erika McGinnes  
10

11  
12  
13 Centre for Reviews and Dissemination, University of York D Chambers, F Paton, P Wilson,  
14 A Eastwood, D Craig, D Fox  
15

16  
17  
18 Leeds Teaching Hospitals NHS Trust, Leeds D Jayne, E McGinnes  
19

20  
21 Corresponding author: Duncan Chambers ([duncan.chambers@york.ac.uk](mailto:duncan.chambers@york.ac.uk))  
22

23 *The Corresponding Author has the right to grant on behalf of all authors and does grant on*  
24 *behalf of all authors, a worldwide licence*  
25 *(<http://www.bmj.com/sites/default/files/BMJ%20Author%20Licence%20March%202013.doc>)*  
26 *to the Publishers and its licensees in perpetuity, in all forms, formats and media (whether*  
27 *known now or created in the future), to i) publish, reproduce, distribute, display and store the*  
28 *Contribution, ii) translate the Contribution into other languages, create adaptations, reprints,*  
29 *include within collections and create summaries, extracts and/or, abstracts of the*  
30 *Contribution and convert or allow conversion into any format including without limitation*  
31 *audio, iii) create any other derivative work(s) based in whole or part on the on the*  
32 *Contribution, iv) to exploit all subsidiary rights to exploit all subsidiary rights that currently*  
33 *exist or as may exist in the future in the Contribution, v) the inclusion of electronic links from*  
34 *the Contribution to third party material where-ever it may be located; and, vi) licence any*  
35 *third party to do any or all of the above. All research articles will be made available on an*  
36 *Open Access basis (with authors being asked to pay an open access fee—*  
37 *see [http://www.bmj.com/about-bmj/resources-authors/forms-policies-and-](http://www.bmj.com/about-bmj/resources-authors/forms-policies-and-checklists/copyright-open-access-and-permission-reuse)*  
38 *checklists/copyright-open-access-and-permission-reuse). The terms of such Open Access*  
39 *shall be governed by a [Creative Commons](https://creativecommons.org/licenses/by/4.0/) licence—details as to which Creative Commons*  
40 *licence will apply to the research article are set out in our worldwide licence referred to*  
41 *above.*  
42  
43  
44  
45  
46  
47  
48  
49  
50  
51  
52  
53  
54  
55  
56  
57  
58  
59  
60

## Abstract

**Objectives:** To identify and critically assess the extent to which systematic reviews of enhanced recovery programmes for patients undergoing colorectal surgery differ in their methodology and reported estimates of the effect.

**Design:** Review of published systematic reviews. We searched the Cochrane Database of Systematic Reviews, the Database of Abstracts of Reviews of Effects (DARE) and Health Technology Assessment (HTA) Database from 1990 to March 2013. Systematic reviews of enhanced recovery programmes for patients undergoing colorectal surgery were eligible for inclusion.

**Primary and secondary outcome measures:** The primary outcome was length of hospital stay. We assessed changes in pooled estimates of treatment effect over time and how these might have been influenced by decisions taken by researchers as well as by the availability of new trials. The quality of systematic reviews was assessed using the CRD DARE critical appraisal process.

**Results:** Ten systematic reviews were included. Systematic reviews of RCTs have consistently shown a reduction in length of hospital stay with enhanced recovery compared with traditional care. The estimated effect tended to increase from 2006 to 2010 as more trials were published but has not altered significantly in the most recent review, despite the inclusion of several unique trials. The best estimate appears to be an average reduction of around 2.5 days in primary post-operative length of stay. Differences between reviews reflected differences in interpretation of inclusion criteria, searching and analytical methods or software.

**Conclusions:** Systematic reviews of enhanced recovery programmes show a high level of research waste, with multiple reviews covering identical or very similar groups of trials. Where multiple reviews exist on a topic, interpretation may require careful attention to apparently minor differences between reviews. Researchers can help readers by acknowledging existing reviews and through clear reporting of key decisions, especially on inclusion/exclusion and on statistical pooling.

**Word count: 298**

## Strengths and limitations

- Systematic reviews of randomised trials have consistently shown that enhanced recovery programmes reduce length of hospital stay for patients undergoing colorectal surgery, compared with usual care. The strength of this study is that we have looked in some detail at the available reviews to identify differences between them and possible explanations, such as differences in intervention and outcome definitions and handling of missing data from included trials in meta-analyses.
- We found a high level of research waste, with multiple reviews covering identical or very similar groups of trials. Differences in pooled effect estimates across reviews reflected differences in interpretation of inclusion criteria, searching and analytical methods or software.
- Where multiple reviews exist on a topic, interpretation may require careful attention to apparently minor differences between reviews. Researchers can help readers by acknowledging existing reviews and through clear reporting of key decisions, especially on inclusion/exclusion and on statistical pooling.
- We identified limitations in reporting as one of the main barriers to understanding differences between reviews. These reporting issues often limited our ability to comment on whether decisions taken by review authors appear to be right' or 'wrong'.

## Introduction

Reduction in length of stay in secondary care hospital settings provides a key potential opportunity to improve productivity in healthcare systems. There has been growing interest over recent years in the use of enhanced recovery programmes (also known as ERAS, fast track, multimodal, rapid or accelerated recovery programmes). The approach was pioneered in Denmark in the late 1990s for patients undergoing colorectal surgery and is now spreading to other surgical pathways such as musculoskeletal, urology and gynaecology.

The underlying aim of enhanced recovery programmes is to ensure that patients are in optimal condition for treatment (to minimise the risk of surgery being postponed or cancelled because of the patient's condition), receive innovative care during surgery and experience optimal post-surgical rehabilitation.(1) Programmes differ widely but share common elements such as patient education and involvement in preoperative planning processes, preoperative oral carbohydrates, improved anaesthetic and postoperative analgesic techniques to reduce the physical stress of the operation, early oral feeding and mobilisation.(2, 3) Enhanced recovery programmes have been delivered in the UK NHS since the early 2000s. Implementation has to date been variable despite the support of the Department of Health and more recently the Royal Colleges. It is likely that this variation reflects both the complexity of enhanced recovery programmes themselves and issues around implementing change in fundamental surgical procedures at a time when the NHS is facing severe funding constraints.

There are a substantial number of systematic reviews and economic evaluations that examine the effectiveness and cost-effectiveness of enhanced recovery programmes. We have used this evidence as the basis of a comprehensive rapid evidence synthesis relating to the effectiveness, cost effectiveness, implementation, delivery and impact of enhanced recovery programmes with particular reference to secondary care hospital settings in the NHS (Paton et al., in preparation). During the course of this project we became aware of significant methodological differences between systematic reviews of enhanced recovery programmes in colorectal surgery (by far the largest body of evidence for any surgical speciality). Reviews published at around the same time varied in the trials they included and in their estimates (derived by meta-analysis) of the reduction in length of stay associated with enhanced recovery programmes.

1  
2  
3 The objective of this study, therefore, is to provide a critical overview of the methodology of  
4 the available systematic reviews and their contribution to the development of the evidence  
5 base available to decision-makers. In particular, we will examine how numerical estimates of  
6 the benefit of enhanced recovery on length of hospital stay have changed over time and how  
7 these might have been influenced by decisions taken by systematic reviewers as well as by  
8 the availability of new trials.  
9  
10  
11

## 12 13 **Methods**

### 14 15 *Literature searches*

16  
17  
18  
19  
20 This study was carried out following a rapid synthesis of evidence relating to enhanced  
21 recovery programmes in all types of surgery (Paton et al., in preparation). To identify  
22 systematic reviews, we searched the Cochrane Database of Systematic Reviews, the  
23 Database of Abstracts of Reviews of Effects (DARE) and Health Technology Assessment  
24 (HTA) Database from 1990 to March 2013. See Appendix 1 for search strategies. The  
25 PROSPERO database was searched to identify any ongoing systematic reviews. Systematic  
26 reviews evaluating enhanced recovery programmes in patients undergoing any type of  
27 elective surgery in a hospital setting in the UK NHS or a comparable healthcare system were  
28 eligible for inclusion in the rapid evidence synthesis. Review authors' definitions of enhanced  
29 recovery programmes were accepted. Outcomes of interest were any measure of clinical  
30 outcomes, patient experience or resource use. Reviews had to compare enhanced recovery  
31 with usual/standard care without a structured multimodal enhanced recovery pathway. For  
32 this methodological study, only systematic reviews of enhanced recovery programmes for  
33 colorectal surgery were considered.  
34  
35  
36  
37  
38  
39  
40  
41

### 42 43 *Study selection*

44  
45  
46 We stored the literature search results in a reference management database (EndNote X6).  
47 Two researchers independently screened all titles and abstracts obtained through the  
48 searches for potentially relevant articles. Full manuscripts of potentially relevant articles were  
49 ordered and two researchers independently assessed the relevance of each article using the  
50 criteria stated above. Disagreements between researchers were resolved by discussion or  
51 by recourse to a third researcher where necessary.  
52  
53  
54  
55  
56  
57  
58  
59  
60

### *Quality assessment*

Quality assessment of systematic reviews was based on the CRD critical appraisal processes for DARE (<http://www.crd.york.ac.uk/crdweb/HomePage.asp>). Specific aspects assessed were adequacy of the search; assessment of quality/risk of bias of included studies; quality assessment results taken into account in the analysis; study details reported and differences between studies accounted for; investigation of statistical heterogeneity; were gaps in research identified; and were the review conclusions justified. The quality assessment was performed by one researcher and checked by a second. Discrepancies were resolved by discussion or by recourse to a third researcher.

### *Data extraction and analysis*

Clinical effectiveness data for the rapid evidence synthesis were extracted into review software (EPPI Reviewer 4.0). An analysis plan for this methodological study was prepared in advance and additional methodological information was extracted into a Microsoft Excel spreadsheet. Data were extracted by one researcher and checked by another; discrepancies were resolved by consensus or where necessary by recourse to a third researcher.

Data extracted from the reviews included the systematic review inclusion criteria (particularly the definition of an ERAS programme); RCTs included (number and list); length of stay mean difference (MD) estimates and 95% confidence intervals (CIs) for each RCT as reported in the review; meta-analysis methods (e.g. type of model used); method used to handle missing means/SDs; definition of primary and total length of stay; pooled estimates of weighted MD (WMD) in length of stay between ERAS and control groups; and source of funding.

Extracted data were examined and tabulated to identify differences between reviews that may have influenced their conclusions and quantitative estimates of the effectiveness of enhanced recovery programmes compared with usual care. We focused on the outcome of length of primary hospital stay (and total length of stay including readmissions, where reported) because reduction of length of stay is a key objective of enhanced recovery programmes and because length of stay was a primary outcome of most included systematic reviews. Only length of stay data from randomised controlled trials (RCTs) were included in this analysis.

## Results

The report by Paton et al. included 11 systematic reviews of ERAS programmes for colorectal surgery. One review(4) focused on quality of life and patient satisfaction and another on compliance and variations in practice(5), leaving nine reviews that reported length of stay, of which seven reported a pooled effect estimate (weighted mean difference (WMD) in days). The review by Zhuang et al.,(6) which was published too late to be fully discussed by Paton et al., is also included in this report, giving a total of ten systematic reviews that met the inclusion criteria for this methodological study (Table 1).

Most of the included reviews were reasonably well conducted and reported (Table 2). The reviews by Wind et al., (7) Walter et al. (8), Spanjersberg et al. (9) and Zhuang et al. (6) met all seven quality criteria and were considered at low risk of bias. Three other reviews met six criteria but all failed to take study quality into account in their synthesis.(10-12) Adamina et al. (13) and Lv et al. (14) failed to meet two of the criteria, while the paper by Rawlinson et al. (15) only clearly met two criteria and was considered potentially at high risk of bias.

### *Chronological development of the evidence base*

Four systematic reviews were published in the years 2006–2009. At this stage only a few randomised trials were available. Wind et al. Wind 2006(7) included three trials; Eskicioglu et al. and Gouvas et al. four trials; and Walter et al. included just two trials (Table 1).

Four further reviews were published in 2010 and 2011. These all considered the same six trials, although one review chose to exclude two of these from its main analysis because the intervention did not meet the review definition of an ERAS programme. (9)

A systematic review by Lv et al. published in 2012 added one more trial, bringing the total to seven. However, just a year later Zhuang et al. published a systematic review with 13 included trials, among them four recent trials by Chinese investigators. With one exception,(16) the trials included in this review were identified and discussed by Paton et al. in our review of trials not included in the then-available systematic reviews.

The included reviews varied somewhat in the extent to which they cited previously published reviews of the field. However, in general reviews tended to cite most of the earlier reviews that would have been available at the time of writing. The first systematic review, by Wind et



1  
2  
3 al., was cited by eight of the nine subsequent reviews. Gouvas et al.'s review was cited by  
4 six of seven subsequent reviews and Varadhan et al. by four out of five (Table 3). The main  
5 exception was the paper by Rawlinson et al.,(15) which was not cited by three later reviews.  
6 Adamina et al. differed from other researchers in their use of Bayesian methodology and  
7 their work was only cited by one of the four later reviews. Zhuang et al. cited all the previous  
8 systematic reviews except that of Lv et al., which may have been published too late to be  
9 included.  
10  
11  
12

### 13 14 15 *Methodological differences between systematic reviews*

16  
17  
18 The four early systematic reviews of ERAS for colorectal surgery showed a number of  
19 methodological differences. Although inclusion criteria appeared similar, Walter et al.  
20 excluded two trials that were included in the reviews by Eskicioglu et al. and Gouvas et al. In  
21 one case(17) this was reported to be because the trial included some patients who had  
22 undergone small bowel surgery; the reason for the other exclusion(18) was not reported.  
23 Walter et al. also differed from the other reviews in its definition of outcomes: length of stay  
24 was measured as total days of admission in this review and as days spent in hospital after  
25 surgery in the other reviews published in the same period.  
26  
27  
28  
29  
30  
31

32 In terms of data synthesis, Eskicioglu et al. was the only one of the four early reviews that  
33 did not perform a meta-analysis, on the grounds that data in the right form (means and  
34 standard deviations) were not available. The remaining three reviews elected to pool.  
35 Gouvas et al. and Wind et al. used random-effects models for their main meta-analysis,  
36 while Walter et al. used a fixed-effect model. Both Wind et al. and Walter et al. justified their  
37 choice on the basis of a random-effects model being more appropriate in the presence of  
38 some heterogeneity but neither stated a level of heterogeneity above which a random-effects  
39 model should be used. Wind et al. stated that trials without means and standard deviations  
40 were omitted from the analysis, while Gouvas et al. estimated from reported medians and  
41 ranges where necessary. Walter et al. did not report on this point.  
42  
43  
44  
45  
46  
47  
48

49 Pooled estimates (WMD) of the effect of ERAS on primary length of stay varied substantially,  
50 being considerably higher and with a wider confidence interval in Walter et al. compared with  
51 the other reviews (Table 4). Wind et al. and Gouvas et al. provided almost identical WMDs,  
52 the only effect of an additional trial in Gouvas et al. being to slightly narrow the 95%  
53 confidence interval. Walter et al. reported no statistical heterogeneity while the other two  
54 reviews found some evidence of heterogeneity.  
55  
56  
57  
58  
59  
60

1  
2  
3 Overall, these reviews suggested considerable uncertainty about the magnitude of the effect  
4 of ERAS programmes in reducing length of hospital stay. Based on 95% confidence  
5 intervals, the effect could plausibly range from less than 0.5 days to almost 5 days.  
6  
7

8  
9 The next group of systematic reviews to be published(9, 12, 13, 15) included up to six RCTs  
10 (additional RCTs by Muller et al. (19) and Serclova et al. (20) were now available).  
11 Spanjersberg et al. differed from other authors in treating length of stay as a secondary  
12 outcome of the review and more significantly by excluding two trials that were included in  
13 most other systematic reviews. The authors stated that Muller et al. and Delaney et al. (17)  
14 failed to meet the inclusion criterion of including at least seven elements in the ERAS  
15 intervention.  
16  
17  
18  
19

20  
21 None of these reviews provided clear definitions of outcomes but Varadhan et al. and  
22 Spanjersberg et al. appeared to measure days in hospital after surgery (i.e., primary length  
23 of stay). Adamina et al. reported their outcome as length of hospital stay without definition or  
24 distinguishing between primary and total length of stay. The reviews also differed in their  
25 reported treatment of studies with missing data (mean/standard deviation): Varadhan et al.  
26 obtained data from original authors, Spanjersberg et al. calculated from median and range  
27 and Adamina et al. did not report their methods. Adamina et al. were the only authors who  
28 used Bayesian methods for meta-analysis, although few details were reported. (13)  
29 Rawlinson et al. (15) did not report an original meta-analysis but instead discussed the  
30 findings of Gouvas et al. and Varadhan et al.  
31  
32  
33  
34  
35  
36  
37

38 Compared with the earlier reviews, this group of systematic reviews reported a substantially  
39 narrower range of effect estimates, all suggesting a reduction of 2.5 to 3 days in primary  
40 hospital stay associated with ERAS programmes (Table 1). The range of 95% confidence  
41 intervals was also narrower (approximately 1.1 to 3.9 days).  
42  
43  
44

45  
46 The 2012 review by Lv et al. added one additional RCT for a total of seven trials. (14) The  
47 new trial(21) compared ERAS with traditional care in patients undergoing both laparoscopic  
48 and open surgery and so was treated as two trials in the meta-analysis. The trial showed a 1  
49 day reduction in length of stay in the laparoscopic setting but there was no difference in  
50 patients undergoing open surgery. Lv et al. also differed from most of the earlier reviews in  
51 defining length of stay as length of the index admission (rather than days in hospital after  
52 surgery). It is unclear whether this explains the discrepancy but Lv et al. reported a smaller  
53 reduction in length of stay compared with the reviews immediately preceding it (-1.88 days,  
54  
55  
56  
57  
58  
59  
60

1  
2  
3 95% CI -2.91 to -0.86). However, this estimate was still compatible with a 'true' reduction of  
4 around 2 to 3 days in primary length of stay.  
5  
6

7  
8 The most recent systematic review that we are aware of was published in May 2013, too late  
9 to be considered in detail in the full report.(6) It is more comprehensive than the previous  
10 reviews, with 13 included trials (two with both open and laparoscopic arms) and 1910  
11 participants. All except one(22) of the RCTs included in our report were also in this  
12 systematic review. However, Zhuang et al. also included one trial that we excluded.(16) In  
13 fact this publication is a single-centre report of results from the LAFA trial that was reported  
14 in full by Vlug et al.(21) so it is likely that there was double-counting of these patients in  
15 Zhuang et al.'s meta-analyses. However, this publication was not included in the meta-  
16 analysis of length of stay outcomes.  
17  
18  
19  
20  
21

22  
23 Some of the trials included for the first time in Zhuang et al.'s review, particularly that of  
24 Ionescu et al. (2009), were available to earlier systematic reviewers. Of the reviews  
25 published in 2010 or later, Varadhan et al. did not give references for any excluded studies.  
26 Adamina et al. gave references for excluded studies but did not list Ionescu et al.,  
27 suggesting that their search did not locate this trial. Rawlinson et al. did not list excluded  
28 studies, while the Cochrane review by Spanjersberg et al. did not list Ionescu et al. among  
29 the excluded studies. Lv et al. excluded 26 out of 33 studies examined in full text but did not  
30 report any details.  
31  
32  
33  
34  
35

36  
37 There was a discrepancy between Zhuang et al. and Lv et al. in their data extraction of the  
38 trial by Vlug et al. There were also minor data extraction discrepancies between these  
39 reviews for two other trials but as they were in opposite directions in the two cases this is  
40 unlikely to have had a major impact on the overall meta-analysis results.  
41  
42  
43

44 Like most included reviews, Zhuang et al. defined length of stay as time in hospital after  
45 surgery. The pooled estimate of a 2.44 day reduction in primary length of stay (95% CI 1.83  
46 to 3.06) for ERAS relative to traditional care was very similar to those reported by Varadhan  
47 et al. (12) and Adamina et al. (13)  
48  
49  
50  
51  
52  
53  
54  
55  
56  
57  
58  
59  
60

## Discussion

### *Main findings*

Systematic reviews of randomised trials have consistently shown a reduction in length of hospital stay with ERAS compared with traditional care. The estimated effect tended to increase over time from 2006 to 2010 as more trials were published but has not altered significantly in the most recent review, despite the inclusion of several unique trials. The best estimate appears to be an average reduction of around 2.5 days in primary post-operative length of hospital stay. However, there is considerable heterogeneity in most pooled estimates and the complexity of ERAS as an intervention means that the benefits achieved in routine practice may differ from those reported in clinical trials. These issues are discussed in the full project report (Paton et al., in preparation).

The published systematic reviews show a high level of redundancy, with multiple reviews covering identical or very similar groups of trials. Differences in pooled effect estimates across reviews reflect differences in interpretation of inclusion criteria, searching and analytical methods or software. A few data extraction discrepancies were observed but these are unlikely to have significantly affected review conclusions.

### *Findings in relation to previous studies*

The existence of multiple systematic reviews covering the same topic was investigated by Siontis et al.(23) They found that of 73 systematic reviews (with meta-analysis) published in 2010, 49 (67%) had at least one other published meta-analysis on the same topic. A particularly striking example was the existence of 11 meta-analyses of statins to prevent atrial fibrillation after cardiac surgery; all except the first of these showed a large positive effect of the intervention. Our findings reinforce those of Siontis et al., although even where reviews included exactly the same trials their pooled estimates of effect were not necessarily identical. Enhanced recovery differs from an intervention like statins after cardiac surgery, being more complex and changing over time as more elements are incorporated into routine practice. This would tend to favour increased variation between reviews along the lines we observed.

A slightly different approach to investigating overlap between systematic reviews was taken by Woodman et al., who looked at the differences between eight reviews of community interventions to promote physical activity.(24) Across the eight reviews there were 28

1  
2  
3 included studies, of which 22 (79%) were only included in one review. There was little cross-  
4 citation between reviews. For most reviews, Woodman et al. could explain why primary data  
5 were not included, which was usually due to the reviews having a relatively narrow scope.  
6 Despite these issues, the review conclusions were similar. Comparing our results with those  
7 of Woodman et al., the enhanced recovery reviews had a higher degree of overlap although  
8 they differed with respect to inclusion of non-randomised studies (not discussed in this  
9 paper). The differences between the enhanced recovery and physical activity reviews  
10 probably reflect the fact that enhanced recovery, although a complex intervention, is more  
11 narrowly defined than interventions to increase physical activity  
12  
13  
14  
15  
16

### 17 18 *Implications*

19  
20  
21 The findings of this study have implications for systematic reviewers, readers of systematic  
22 reviews and producers of systematic review-based evidence products. Systematic reviewers  
23 can help readers compare their reviews with other similar studies by clear reporting of key  
24 decisions, especially on inclusion/exclusion and on statistical pooling. Most of the reviews of  
25 enhanced recovery programmes performed a meta-analysis to calculate a WMD in length of  
26 stay between enhanced recovery and usual care groups. Calculating the WMD requires the  
27 means and standard deviations (SDs) of length of stay in each group in the included trials,  
28 but trials often report a different measure such as median and range (or interquartile range).  
29 Systematic reviews can deal with this situation in different ways, for example by using  
30 formulae to estimate the mean and SD, contacting the trial authors or omitting trials from any  
31 meta-analysis if mean and SD are not reported. The enhanced recovery reviews adopted all  
32 of these approaches but did not report which data were estimated rather than derived  
33 directly from trial reports. Improved reporting in this area would improve transparency and  
34 help readers to understand discrepancies between apparently similar meta-analyses. Length  
35 of stay outcomes were not always clearly defined or reported and differences between  
36 reviews may in part stem from the fact that they were measuring an outcome in different  
37 ways.  
38  
39  
40  
41  
42  
43  
44  
45  
46  
47

48  
49 Readers of systematic reviews need to be aware of the existence of multiple systematic  
50 reviews for a high percentage of topics. This means they should not rely uncritically on the  
51 first review they find and underlines the importance of services that critically appraise  
52 systematic reviews and those that provide overviews of reviews across a topic area.<sup>(25, 26)</sup>  
53 As an aid to transparency, authors of new systematic reviews should also acknowledge the  
54 existence of any systematic reviews addressing the same or a similar question.  
55  
56  
57  
58  
59  
60

1  
2  
3 The use of systematic reviews to produce rapid evidence summaries to inform decision-  
4 making is an area where methodology is still developing, although some methodological  
5 frameworks have been published.(27, 28) Assessment of the quality and reliability of  
6 systematic reviews is an important part of this process but the present study suggests that  
7 conventional approaches to critical appraisal are not sufficient and careful attention should  
8 be paid to apparently minor differences between reviews. This may require increased  
9 extraction of methodological data even though the results may not be included in published  
10 evidence summaries aimed at decision-makers.  
11  
12  
13  
14  
15

### 16 *Strengths and limitations*

17  
18  
19  
20 The strength of this study is that we have looked in some detail at reviews of a complex  
21 clinical intervention to identify differences between them and possible explanations, such as  
22 differences in intervention and outcome definitions and handling of missing data from  
23 included trials in meta-analyses. We have identified limitations in reporting as one of the  
24 main barriers to understanding differences between reviews of the same topic. These  
25 reporting issues have often limited our ability to comment on whether decisions taken by  
26 review authors appear to be right' or 'wrong'. The discrepancies between reviews identified  
27 in this study sometimes arose from decisions where both options could be considered  
28 reasonable, for example whether or not to exclude the trial by Delaney et al.(17) because a  
29 small number of patients undergoing small bowel surgery were included.  
30  
31  
32  
33  
34  
35

### 36 *Unanswered questions/further research*

37  
38  
39 The current study suggests a need for further, more in-depth research into methods of  
40 quality assessment of systematic reviews; to make the best use of a cumulative evidence  
41 base for decision-making; and to identify methodological issues and decision points that may  
42 influence the eventual conclusions of a review. These issues are particularly important for  
43 researchers seeking to help decision-makers interpret and use systematic reviews.  
44 Enhanced recovery is a complex intervention with multiple components and its successful  
45 implementation is likely to be influenced by numerous background factors. Given this  
46 background, researchers and clinicians carrying out new systematic reviews should ensure  
47 that their chosen method of synthesis is appropriate for exploring intervention complexity.  
48 The recently published research agenda for reviews of complex interventions(29) provides  
49 timely guidance in this regard.  
50  
51  
52  
53  
54  
55  
56  
57  
58  
59  
60

1  
2  
3 Systematic reviews of enhanced recovery programmes in colorectal surgery continue to be  
4 published and we are aware of at least two publications since our search was  
5 completed.(30, 31) The authors of one of these reviews refer to their paper as ‘a substantial  
6 update from previous meta-analyses’(30) but in fact the included trials and overall findings  
7 are almost identical to those of Zhuang et al.(6) This is not the fault of the authors but  
8 represents an avoidable waste of research resources. Systematic reviews are now  
9 increasingly being registered prospectively at the outset on databases such as  
10 PROSPERO(32) and it will be interesting to see whether the production of overlapping  
11 reviews decreases over time.  
12  
13  
14  
15  
16

17  
18 **Word count (main text): 3973**  
19  
20  
21  
22  
23  
24  
25  
26  
27  
28  
29  
30  
31  
32  
33  
34  
35  
36  
37  
38  
39  
40  
41  
42  
43  
44  
45  
46  
47  
48  
49  
50  
51  
52  
53  
54  
55  
56  
57  
58  
59  
60



**Disclaimer:**

This report presents independent research funded by the National Institute for Health Research (NIHR). The views expressed are those of the authors and do not necessarily reflect those of the NIHR Health Services and Delivery Research programme or the Department of Health.

**Acknowledgements:** This project was funded as part of a programme of research funded by the NIHR Health Services and Delivery Research programme (Project ref: 11/1026/04).

**Contributors:** All authors contributed to the design of this methodological study and commented on the analysis plan and/or draft manuscript. PW took overall responsibility for the rapid evidence synthesis and is guarantor. D Chambers and FP extracted additional methodological data. D Chambers wrote the first draft of the paper. All authors have seen and approved the final version.

**Competing interests:** All authors have completed the ICMJE uniform disclosure form at [www.icmje.org/coi\\_disclosure.pdf](http://www.icmje.org/coi_disclosure.pdf) and declare: no support from any organisation for the submitted work; no financial relationships with any organisations that might have an interest in the submitted work in the previous three years; no other relationships or activities that could appear to have influenced the submitted work.

**Transparency declaration:** The lead author (the manuscript's guarantor) affirms that this manuscript is an honest, accurate, and transparent account of the study being reported; that no important aspects of the study have been omitted; and that any discrepancies from the study as planned (and, if relevant, registered) have been explained.



## References

1. Enhanced Recovery Partnership Programme. Delivering enhanced recovery – Helping patients to get better sooner after surgery. London: Department of Health, 2010 March 31st.
2. Kehlet H, Wilmore DW. Multimodal strategies to improve surgical outcome. *Am J Surg.* 2002 Jun;183(6):630-41.
3. Sturm L, Cameron AL. Brief review: Fast-track surgery and enhanced recovery after surgery (ERAS) programs. Melbourne: Australian Safety and Efficacy Register of New Interventional Procedures - Surgical (ASERNIP-S), 2009 Contract No.: 3.
4. Khan S, Wilson T, Ahmed J, Owais A, MacFie J. Quality of life and patient satisfaction with enhanced recovery protocols. *Colorectal Dis.* 2010;12(12):1175-82.
5. Ahmed J, Khan S, Lim M, Chandrasekaran TV, MacFie J. Enhanced recovery after surgery protocols - compliance and variations in practice during routine colorectal surgery. *Colorectal Dis.* 2012;14(9):1045-51.
6. Cheng-Le Z, Xing-Zhao YX-D, Z., Bi-Cheng C, Zhen Y. Enhanced recovery after surgery programs versus traditional care for colorectal surgery: A meta-analysis of randomized controlled trials. *Dis Colon Rectum.* 2013;56:667-78.
7. Wind J, Polle SW, Fung Kon Jin PH, Dejong CH, Meyenfeldt MF, Ubbink DT, et al. Systematic review of enhanced recovery programmes in colonic surgery. *Br J Surg.* 2006;93(7):800-9.
8. Walter CJ, Collin J, Dumville JC, Drew PJ, Monson JR. Enhanced recovery in colorectal resections: a systematic review and meta-analysis. *Colorectal Dis.* 2009 May;11(4):344-53.
9. Spanjersberg Willem R, Reurings J, Keus F, van Laarhoven Cornelis JHM. Fast track surgery versus conventional recovery strategies for colorectal surgery. *Cochrane Database of Systematic Reviews.* 2011 (2).
10. Eskicioglu C, Forbes SS, Aarts M-A, Okrainec A, McLeod RS. Enhanced Recovery after Surgery (ERAS) programs for patients having colorectal surgery: a meta-analysis of randomized trials. *J Gastrointest Surg.* 2009 Dec;13(12):2321-9.
11. Gouvas N, Tan E, Windsor A, Xynos E, Tekkis PP. Fast-track vs standard care in colorectal surgery: a meta-analysis update. *Int J Colorectal Dis.* 2009 Oct;24(10):1119-31.
12. Varadhan KK, Neal KR, Dejong CH, Fearon KC, Ljungqvist O, Lobo DN. The enhanced recovery after surgery (ERAS) pathway for patients undergoing major elective open colorectal surgery: a meta-analysis of randomized controlled trials. *Clin Nutr.* 2010;29(4):434-40.
13. Adamina M, Kehlet H, Tomlinson GA, Senagore AJ, Delaney CP. Enhanced recovery pathways optimize health outcomes and resource utilization: a meta-analysis of randomized controlled trials in colorectal surgery. *Surgery.* 2011;149(6):830-40.
14. Lv L, Shao Y-f, Zhou Y-b. The enhanced recovery after surgery (ERAS) pathway for patients undergoing colorectal surgery: an update of meta-analysis of randomized controlled trials. *Int J Colorectal Dis.* 2012;27:1549-54.
15. Rawlinson A, Kang P, Evans J, Khanna A. A systematic review of enhanced recovery protocols in colorectal surgery. *Ann R Coll Surg Engl.* 2011;93(8):583-8.
16. van Bree SH, Vlug MS, Bemelman WA, Hollmann MW, Ubbink DT, Zwinderman AH, et al. Faster recovery of gastrointestinal transit after laparoscopy and fast-track care in patients undergoing colonic surgery. *Gastroenterology.* 2011 Sep;141(3):872-80.e1-4.
17. Delaney CP, Zutshi M, Senagore AJ, Remzi FH, Hammel J, Fazio VW. Prospective, randomized, controlled trial between a pathway of controlled rehabilitation with early ambulation and diet and traditional postoperative care after laparotomy and intestinal resection. *Dis Colon Rectum.* 2003 Jul;46(7):851-9.
18. Khoo CK, Vickery CJ, Forsyth N, Vinall NS, Eyre-Brook IA. A prospective randomized controlled trial of multimodal perioperative management protocol in patients undergoing elective colorectal resection for cancer. *Ann Surg.* 2007 Jun;245(6):867-72.

19. Muller S, Zalunardo MP, Hubner M, Clavien PA, Demartines N, Zurich Fast Track Study G. A fast-track program reduces complications and length of hospital stay after open colonic surgery. *Gastroenterology*. 2009 Mar;136(3):842-7.
20. Serclova Z, Dytrych P, Marvan J, Nova K, Hankeova Z, Ryska O, et al. Fast-track in open intestinal surgery: prospective randomized study (Clinical Trials Gov Identifier no. NCT00123456). *Clin Nutr*. 2009 Dec;28(6):618-24.
21. Vlug MS, Wind J, Hollmann MW, Ubbink DT, Cense HA, Engel AF, et al. Laparoscopy in combination with fast track multimodal management is the best perioperative strategy in patients undergoing colonic surgery: a randomized clinical trial (LAFA-study). *Ann Surg*. 2011 Dec;254(6):868-75.
22. Lee TG, Kang SB, Kim DW, Hong S, Heo SC, Park KJ. Comparison of early mobilization and diet rehabilitation program with conventional care after laparoscopic colon surgery: a prospective randomized controlled trial. *Dis Colon Rectum*. 2011 Jan;54(1):21-8.
23. Siontis KC, Hernandez-Boussard T, Ioannidis JP. Overlapping meta-analyses on the same topic: survey of published studies. *BMJ*. 2013;347:f4501.
24. Woodman J, Thomas J, Dickson K. How explicable are differences between reviews that appear to address a similar research question? A review of reviews of physical activity interventions. *Systematic reviews*. 2012;1:37.
25. Chambers D, Wilson P, Thompson C, Hanbury A, Farley K, Light K. Maximizing the impact of systematic reviews in healthcare decision-making: a systematic scoping review of knowledge translation resources. *Milbank Q*. 2011;89(1):131-56.
26. Lavis JN. How can we support the use of systematic reviews in policymaking? *PLoS Medicine*. 2009;6(11):e1000141.
27. Chambers D, Wilson P. A framework for production of systematic review based briefings to support evidence-informed decision-making. *Systematic reviews*. 2012;1:32.
28. Khangura S, Konnyu K, Cushman R, Grimshaw J, Moher D. Evidence summaries: the evolution of a rapid review approach. *Systematic reviews*. 2012;1:10.
29. Noyes J, Gough D, Lewin S, Mayhew A, Michie S, Pantoja T, et al. A research and development agenda for systematic reviews that ask complex questions about complex interventions. *J Clin Epidemiol*. 2013 Nov;66(11):1262-70.
30. Greco M, Capretti G, Beretta L, Gemma M, Pecorelli N, Braga M. Enhanced Recovery Program in Colorectal Surgery: A Meta-analysis of Randomized Controlled Trials. *World J Surg*. 2013 Dec 25.
31. Gianotti L, Beretta S, Luperto M, Bernasconi D, Valsecchi MG, Braga M. Enhanced recovery strategies in colorectal surgery: is the compliance with the whole program required to achieve the target? *Int J Colorectal Dis*. 2013 Dec 13.
32. Booth A, Clarke M, Dooley G, Gherzi D, Moher D, Petticrew M, et al. PROSPERO at one year: an evaluation of its utility. *Systematic reviews*. 2013;2:4.
33. Anderson AD, McNaught CE, MacFie J, Tring I, Barker P, Mitchell CJ. Randomized clinical trial of multimodal optimization and standard perioperative surgical care. *Br J Surg*. 2003 Dec;90(12):1497-504.
34. Gatt M, Anderson AD, Reddy BS, Hayward-Sampson P, Tring IC, MacFie J. Randomized clinical trial of multimodal optimization of surgical care in patients undergoing major colonic resection. *Br J Surg*. 2005 Nov;92(11):1354-62.
35. Ionescu D, Iancu C, Ion D, Al-Hajjar N, Margarit S, Mocan L, et al. Implementing fast-track protocol for colorectal surgery: a prospective randomized clinical trial. *World J Surg*. 2009 Nov;33(11):2433-8.
36. Garcia-Botello S, Canovas de Lucas R, Tornero C, Escamilla B, Espi-Macias A, Esclapez-Valero P, et al. Implementation of a perioperative multimodal rehabilitation protocol in elective colorectal surgery. A prospective randomised controlled study. *Cir Esp*. 2011 Mar;89(3):159-66.
37. Ren L, Zhu D, Wei Y, Pan X, Liang L, Xu J, et al. Enhanced Recovery After Surgery (ERAS) program attenuates stress and accelerates recovery in patients after radical resection for colorectal cancer: a prospective randomized controlled trial. *World J Surg*. 2012 Feb;36(2):407-14.

- 1  
2  
3 38. Wang G, Jiang Z, Zhao K, Li G, Liu F, Pan H, et al. Immunologic response after  
4 laparoscopic colon cancer operation within an enhanced recovery program. *J Gastrointest*  
5 *Surg.* 2012 Jul;16(7):1379-88.  
6 39. Wang Q, Suo J, Jiang J, Wang C, Zhao YQ, Cao X. Effectiveness of fast-track  
7 rehabilitation vs conventional care in laparoscopic colorectal resection for elderly patients: a  
8 randomized trial. *Colorectal Dis.* 2012 Aug;14(8):1009-13.  
9 40. Yang D, He W, Zhang S, Chen H, Zhang C, He Y. Fast-track surgery improves  
10 postoperative clinical recovery and immunity after elective surgery for colorectal carcinoma:  
11 randomized controlled clinical trial. *World J Surg.* 2012 Aug;36(8):1874-80.  
12  
13  
14  
15  
16  
17  
18  
19  
20  
21  
22  
23  
24  
25  
26  
27  
28  
29  
30  
31  
32  
33  
34  
35  
36  
37  
38  
39  
40  
41  
42  
43  
44  
45  
46  
47  
48  
49  
50  
51  
52  
53  
54  
55  
56  
57  
58  
59  
60

For peer review only

1  
2  
3  
4  
5  
6  
7  
8  
9  
10  
11  
12  
13  
14  
15  
16  
17  
18  
19  
20  
21  
22  
23  
24  
25  
26  
27  
28  
29  
30  
31  
32  
33  
34  
35  
36  
37  
38  
39  
40  
41  
42  
43  
44  
45  
46  
47  
48  
49

Table 1: Overview of systematic reviews of ERAS for colorectal surgery

| Review               | Minimum definition of ERAS intervention                          | Search cut-off date     | Included RCTs                                                                                                                                                                                                              |
|----------------------|------------------------------------------------------------------|-------------------------|----------------------------------------------------------------------------------------------------------------------------------------------------------------------------------------------------------------------------|
| Wind 2006(7)         | At least four elements required                                  | December 2005           | Anderson 2003(33); Delaney 2003(17); Gatt 2005(34)                                                                                                                                                                         |
| Eskicioglu 2009(10)  | Not stated                                                       | May 2008                | Anderson 2003(33); Delaney 2003(17); Gatt 2005(34); Khoo 2007(18)                                                                                                                                                          |
| Gouvas 2009(11)      | At least four elements required                                  | July 2008               | Anderson 2003(33); Delaney 2003(17); Gatt 2005(34); Khoo 2007(18)                                                                                                                                                          |
| Walter 2009(8)       | At least five elements required (pre-, peri- and post-operative) | January 2007            | Anderson 2003(33); Gatt 2005(34)                                                                                                                                                                                           |
| Varadhan 2010(12)    | At least four elements required (pre-, peri- and post-operative) | November 2009           | Anderson 2003(33); Delaney 2003(17); Gatt 2005(34); Khoo 2007(18); Muller 2009(19); Serclova 2009(20)                                                                                                                      |
| Adamina 2011(13)     | Documented compliance with at least four of five key elements    | June 2010               | Anderson 2003(33); Delaney 2003(17); Gatt 2005(34); Khoo 2007(18); Muller 2009(19); Serclova 2009(20)                                                                                                                      |
| Rawlinson 2011(15)   | At least four elements required (pre-, peri- and post-operative) | February 2011           | Anderson 2003(33); Delaney 2003(17); Gatt 2005(34); Khoo 2007(18); Muller 2009(19); Serclova 2009(20)                                                                                                                      |
| Spanjersberg 2011(9) | At least seven elements required                                 | Unclear (January 2011?) | Anderson 2003(33); Gatt 2005(34); Khoo 2007(18); Serclova 2009(20)                                                                                                                                                         |
| Lv 2012(14)          | Not stated                                                       | April 2012              | Anderson 2003(33); Delaney 2003(17); Gatt 2005(34); Khoo 2007(18); Muller 2009(19); Serclova 2009(20); Vlug 2011(21)                                                                                                       |
| Zhuang 2013.(6)      | At least seven elements required                                 | July 2012               | Anderson 2003(33); Gatt 2005(34); Khoo 2007(18); Muller 2009(19); Serclova 2009(20); Ionescu 2009(35); Vlug 2011(21) Garcia-Botello 2011(36); Bree 2011(16); Ren 2012(37); G Wang 2012(38); Q Wang 2012(39); Yang 2012(40) |

Table 2: Risk of bias in included systematic reviews

| Review               | Adequate search | Risk of bias assessed | Quality score accounted for in analysis | Study details reported and differences accounted for | Statistical heterogeneity investigated | Gaps in research identified | Conclusions justified |
|----------------------|-----------------|-----------------------|-----------------------------------------|------------------------------------------------------|----------------------------------------|-----------------------------|-----------------------|
| Wind 2006(7)         | ✓               | ✓                     | ✓                                       | ✓                                                    | ✓                                      | ✓                           | ✓                     |
| Eskicioglu 2009(10)  | ✓               | ✓                     | x                                       | ✓                                                    | ✓                                      | ✓                           | ✓                     |
| Gouvas 2009(11)      | ✓               | ✓                     | x                                       | ✓                                                    | ✓                                      | ✓                           | ✓                     |
| Walter 2009(8)       | ✓               | ✓                     | ✓                                       | ✓                                                    | ✓                                      | ✓                           | ✓                     |
| Varadhan 2010(12)    | ✓               | ✓                     | x                                       | ✓                                                    | ✓                                      | ✓                           | ✓                     |
| Adamina 2011(13)     | ✓               | ✓                     | UC                                      | ✓                                                    | UC                                     | ✓                           | ✓                     |
| Rawlinson 2011(15)   | ✓               | x                     | x                                       | ✓                                                    | UC                                     | x                           | UC                    |
| Spanjersberg 2011(9) | ✓               | ✓                     | ✓                                       | ✓                                                    | ✓                                      | ✓                           | ✓                     |
| Lv 2012(14)          | ✓               | ✓                     | x                                       | x                                                    | ✓                                      | ✓                           | ✓                     |
| Zhuang 2013.(6)      | ✓               | ✓                     | ✓                                       | ✓                                                    | ✓                                      | ✓                           | ✓                     |

UC, unclear

1  
2  
3  
4  
5  
6  
7  
8  
9  
10  
11  
12  
13  
14  
15  
16  
17  
18  
19  
20  
21  
22  
23  
24  
25  
26  
27  
28  
29  
30  
31  
32  
33  
34  
35  
36  
37  
38  
39  
40  
41  
42  
43  
44  
45  
46  
47  
48  
49

Table 3: Cross-citation among included systematic reviews

| Review               | Reviews cited                                                                                                                 | Cited by subsequent reviews                                                                                                                          |
|----------------------|-------------------------------------------------------------------------------------------------------------------------------|------------------------------------------------------------------------------------------------------------------------------------------------------|
| Wind 2006(7)         | NA                                                                                                                            | Eskicioglu 2009(10); Gouvas 2009(11); Walter 2009(8); Varadhan 2010(12); Adamina 2011(13); Rawlinson 2011(15); Spanjersberg 2011(9); Zhuang 2013.(6) |
| Eskicioglu 2009(10)  | Wind 2006(7)                                                                                                                  | Varadhan 2010(12); Rawlinson 2011(15); Zhuang 2013.(6)                                                                                               |
| Gouvas 2009(11)      | Wind 2006(7)                                                                                                                  | Varadhan 2010(12); Adamina 2011(13); Rawlinson 2011(15); Spanjersberg 2011(9); Lv 2012(14); Zhuang 2013.(6)                                          |
| Walter 2009(8)       | Wind 2006(7)                                                                                                                  | Varadhan 2010(12); Spanjersberg 2011(9); Lv 2012(14); Zhuang 2013.(6)                                                                                |
| Varadhan 2010(12)    | Wind 2006(7); Eskicioglu 2009(10); Gouvas 2009(11); Walter 2009(8)                                                            | Rawlinson 2011(15); Spanjersberg 2011(9); Lv 2012(14); Zhuang 2013.(6)                                                                               |
| Adamina 2011(13)     | Wind 2006(7); Gouvas 2009(11)                                                                                                 | Zhuang 2013.(6)                                                                                                                                      |
| Rawlinson 2011(15)   | Wind 2006(7); Eskicioglu 2009(10); Gouvas 2009(11); Varadhan 2010(12)                                                         | Not cited                                                                                                                                            |
| Spanjersberg 2011(9) | Wind 2006(7); Gouvas 2009(11); Walter 2009(8); Varadhan 2010(12)                                                              | Lv 2012(14); Zhuang 2013.(6)                                                                                                                         |
| Lv 2012(14)          | Gouvas 2009(11); Walter 2009(8); Varadhan 2010(12); Spanjersberg 2011(9)                                                      | Not cited                                                                                                                                            |
| Zhuang 2013.(6)      | Wind 2006(7); Eskicioglu 2009(10); Gouvas 2009(11); Walter 2009(8); Varadhan 2010(12); Adamina 2011(13); Spanjersberg 2011(9) | NA                                                                                                                                                   |

NA, not applicable

Table 4: Summary of meta-analyses for length of stay

| Review               | Definition of primary length of stay                                    | Meta-analysis model | Pooled effect estimate for primary length of stay                                     | Pooled effect estimate for total length of stay |
|----------------------|-------------------------------------------------------------------------|---------------------|---------------------------------------------------------------------------------------|-------------------------------------------------|
| Wind 2006(7)         | Days in hospital after surgery                                          | Random              | WMD -1.89 (-3.61 to -0.18) $I^2 = 63.4\%$                                             | Not calculated                                  |
| Eskicioglu 2009(10)  | Days in hospital after surgery                                          | NA                  | Not calculated (authors stated pooling was not feasible)                              |                                                 |
| Gouvas 2009(11)      | Days in hospital after surgery                                          | Random              | WMD -1.88 (-3.35 to -0.41) $I^2 = 45\%$                                               | WMD -1.73 (-3.50 to 0.04) $I^2 = 0\%$           |
| Walter 2009(8)       | Days in hospital during index admission                                 | Fixed               | WMD -3.64 (-4.98 to -2.29) $I^2 = 0\%$                                                | WMD -3.75 (-5.11 to -2.40) $I^2 = 0\%$          |
| Varadhan 2010(12)    | Not explicitly defined but appears to be days in hospital after surgery | Random              | WMD -2.51 (-3.54 to -1.47) $I^2 = 55\%$                                               | Not calculated                                  |
| Adamina 2011(13)     | Length of stay outcome not explicitly defined                           | Bayesian            | Mean difference for 'length of stay' -2.5 (95% CrI -3.92 to -1.11) $I^2$ not reported |                                                 |
| Rawlinson 2011(15)   | Not defined                                                             | NA                  | Not calculated (authors cited findings from Gouvas and Varadhan)                      |                                                 |
| Spanjersberg 2011(9) | Not explicitly defined but appears to be days in hospital after surgery | Fixed               | WMD -2.94 (-3.69 to -2.19) $I^2 = 0\%$                                                | Not calculated                                  |
| Lv 2012(14)          | Days in hospital during index admission                                 | Random              | WMD -1.88 (-2.91 to -0.86) $I^2 = 75\%$                                               | Not calculated                                  |
| Zhuang 2013.(6)      | Days in hospital after surgery                                          | Random              | WMD -2.44 (-3.06 to -1.83) $I^2 = 88\%$                                               | WMD -2.39 (-3.70 to -1.09) $I^2 = 85\%$         |

NA, not applicable

**Appendix 1: Search strategy for systematic reviews**

- 1  
2  
3  
4  
5  
6  
7  
8  
9  
10  
11  
12 #1 ERAS:ti,ab  
13 #2 ((enhanced or early or accelerated or fast track or fast-track or rapid) near/1  
14 (recover\* or rehabilitat\* or convalesc\* or mobil\* or ambulat\* or walk\* or feed\* or nutrition\* or  
15 eat\*) near/3 (surger\* or program\* or protocol\* or pathway\*)):ti,ab  
16 #3 ((multimodal or optimised or optimized) near/1 (recover\* or rehabilitat\* or  
17 convalesc\*)):ti,ab  
18 #4 #1 or #2 or #3  
19 #5 MeSH descriptor: [Receptors, Endothelin] explode all trees  
20 #6 #4 not #5  
21  
22  
23  
24  
25  
26  
27  
28  
29  
30  
31  
32  
33  
34  
35  
36  
37  
38  
39  
40  
41  
42  
43  
44  
45  
46  
47  
48  
49  
50  
51  
52  
53  
54  
55  
56  
57  
58  
59  
60



# BMJ Open

## An overview and methodological assessment of systematic reviews and meta-analyses of enhanced recovery programmes in colorectal surgery.

|                                 |                                                                                                                                                                                                                                                                                                                                                                                                                                                                                                                                                       |
|---------------------------------|-------------------------------------------------------------------------------------------------------------------------------------------------------------------------------------------------------------------------------------------------------------------------------------------------------------------------------------------------------------------------------------------------------------------------------------------------------------------------------------------------------------------------------------------------------|
| Journal:                        | <i>BMJ Open</i>                                                                                                                                                                                                                                                                                                                                                                                                                                                                                                                                       |
| Manuscript ID:                  | bmjopen-2014-005014.R1                                                                                                                                                                                                                                                                                                                                                                                                                                                                                                                                |
| Article Type:                   | Research                                                                                                                                                                                                                                                                                                                                                                                                                                                                                                                                              |
| Date Submitted by the Author:   | 30-Apr-2014                                                                                                                                                                                                                                                                                                                                                                                                                                                                                                                                           |
| Complete List of Authors:       | Chambers, Duncan; University of York, Centre for Reviews and Dissemination<br>Paton, Fiona; University of York, Centre for Reviews and Dissemination<br>Wilson, Paul; University of York, Centre for Reviews and Dissemination<br>Eastwood, Alison; University of York, Centre for Reviews and Dissemination<br>Craig, Dawn; University of York, Centre for Reviews and Dissemination<br>Fox, Dave; University of York, Centre for Reviews and Dissemination<br>Jayne, David; Leeds Teaching Hospitals,<br>McGinnes, Erika; Leeds Teaching Hospitals, |
| <b>Primary Subject Heading</b>: | Surgery                                                                                                                                                                                                                                                                                                                                                                                                                                                                                                                                               |
| Secondary Subject Heading:      | Research methods                                                                                                                                                                                                                                                                                                                                                                                                                                                                                                                                      |
| Keywords:                       | SURGERY, Enhanced recovery after surgery, Fast track                                                                                                                                                                                                                                                                                                                                                                                                                                                                                                  |
|                                 |                                                                                                                                                                                                                                                                                                                                                                                                                                                                                                                                                       |

SCHOLARONE™  
Manuscripts

Only

1  
2  
3 **An overview and methodological assessment of systematic reviews and meta-**  
4 **analyses of enhanced recovery programmes in colorectal surgery**  
5  
6  
7

8 Duncan Chambers, Fiona Paton, Paul Wilson, Alison Eastwood, Dawn Craig, Dave Fox,  
9 David Jayne, Erika McGinnes  
10

11  
12  
13 Centre for Reviews and Dissemination, University of York D Chambers, F Paton, P Wilson,  
14 A Eastwood, D Craig, D Fox  
15

16  
17  
18 Leeds Teaching Hospitals NHS Trust, Leeds D Jayne, E McGinnes  
19

20  
21 Corresponding author: Duncan Chambers ([duncan.chambers@york.ac.uk](mailto:duncan.chambers@york.ac.uk))  
22  
23  
24  
25  
26  
27  
28  
29  
30  
31  
32  
33  
34  
35  
36  
37  
38  
39  
40  
41  
42  
43  
44  
45  
46  
47  
48  
49  
50  
51  
52  
53  
54  
55  
56  
57  
58  
59  
60

## Abstract

**Objectives:** To identify and critically assess the extent to which systematic reviews of enhanced recovery programmes for patients undergoing colorectal surgery differ in their methodology and reported estimates of effect.

**Design:** Review of published systematic reviews. We searched the Cochrane Database of Systematic Reviews, the Database of Abstracts of Reviews of Effects (DARE) and Health Technology Assessment (HTA) Database from 1990 to March 2013. Systematic reviews of enhanced recovery programmes for patients undergoing colorectal surgery were eligible for inclusion.

**Primary and secondary outcome measures:** The primary outcome was length of hospital stay. We assessed changes in pooled estimates of treatment effect over time and how these might have been influenced by decisions taken by researchers as well as by the availability of new trials. The quality of systematic reviews was assessed using the CRD DARE critical appraisal process.

**Results:** Ten systematic reviews were included. Systematic reviews of RCTs have consistently shown a reduction in length of hospital stay with enhanced recovery compared with traditional care. The estimated effect tended to increase from 2006 to 2010 as more trials were published but has not altered significantly in the most recent review, despite the inclusion of several unique trials. The best estimate appears to be an average reduction of around 2.5 days in primary post-operative length of stay. Differences between reviews reflected differences in interpretation of inclusion criteria, searching and analytical methods or software.

**Conclusions:** Systematic reviews of enhanced recovery programmes show a high level of research waste, with multiple reviews covering identical or very similar groups of trials. Where multiple reviews exist on a topic, interpretation may require careful attention to apparently minor differences between reviews. Researchers can help readers by acknowledging existing reviews and through clear reporting of key decisions, especially on inclusion/exclusion and on statistical pooling.

**Word count: 298**

## Strengths and limitations

- Systematic reviews of randomised trials have consistently shown that enhanced recovery programmes reduce length of hospital stay for patients undergoing colorectal surgery, compared with usual care. The strength of this study is that we have looked in some detail at the available reviews to identify differences between them and possible explanations, such as differences in intervention and outcome definitions and handling of missing data from included trials in meta-analyses.
- We found a high level of research waste, with multiple reviews covering identical or very similar groups of trials. Differences in pooled effect estimates across reviews reflected differences in interpretation of inclusion criteria, searching and analytical methods or software.
- Where multiple reviews exist on a topic, interpretation may require careful attention to apparently minor differences between reviews. Researchers can help readers by acknowledging existing reviews and through clear reporting of key decisions, especially on inclusion/exclusion and on statistical pooling.
- We identified limitations in reporting as one of the main barriers to understanding differences between reviews. These reporting issues often limited our ability to comment on whether decisions taken by review authors appear to be right' or 'wrong'.

## Introduction

Reduction in length of stay in secondary care hospital settings provides a key potential opportunity to improve productivity in healthcare systems. There has been growing interest over recent years in the use of enhanced recovery programmes (also known as ERAS, fast track, multimodal, rapid or accelerated recovery programmes). The approach was pioneered in Denmark in the late 1990s for patients undergoing colorectal surgery and is now spreading to other surgical pathways such as musculoskeletal, urology and gynaecology.

The underlying aim of enhanced recovery programmes is to ensure that patients are in optimal condition for treatment (to minimise the risk of surgery being postponed or cancelled because of the patient's condition), receive innovative care during surgery and experience optimal post-surgical rehabilitation.<sup>(1)</sup> Programmes differ widely but share common elements such as patient education and involvement in preoperative planning processes, preoperative oral carbohydrates, improved anaesthetic and postoperative analgesic techniques to reduce the physical stress of the operation, early oral feeding and mobilisation.<sup>(2, 3)</sup> Enhanced recovery programmes have been delivered in the UK NHS since the early 2000s. Implementation has to date been variable despite the support of the Department of Health and more recently the Royal Colleges. It is likely that this variation reflects both the complexity of enhanced recovery programmes themselves and issues around implementing change in fundamental surgical procedures at a time when the NHS is facing severe funding constraints.

There are a substantial number of systematic reviews and economic evaluations that examine the effectiveness and cost-effectiveness of enhanced recovery programmes. We have used this evidence as the basis of a comprehensive rapid evidence synthesis relating to the effectiveness, cost effectiveness, implementation, delivery and impact of enhanced recovery programmes with particular reference to secondary care hospital settings in the NHS (Paton et al., in preparation). During the course of this project we became aware of significant methodological differences between systematic reviews of enhanced recovery programmes in colorectal surgery (by far the largest body of evidence for any surgical speciality). Reviews published at around the same time varied in the trials they included and in their estimates (derived by meta-analysis) of the reduction in length of stay associated with enhanced recovery programmes.

1  
2  
3 The objective of this study, therefore, is to provide a critical overview of the methodology of  
4 the available systematic reviews and their contribution to the development of the evidence  
5 base available to decision-makers. In particular, we will examine how numerical estimates of  
6 the benefit of enhanced recovery on length of hospital stay have changed over time and how  
7 these might have been influenced by decisions taken by systematic reviewers as well as by  
8 the availability of new trials.  
9  
10  
11

## 12 13 **Methods**

### 14 15 *Literature searches*

16  
17  
18  
19  
20 This study was carried out following a rapid synthesis of evidence relating to enhanced  
21 recovery programmes in all types of surgery (Paton et al., in preparation). To identify  
22 systematic reviews, we searched the Cochrane Database of Systematic Reviews, the  
23 Database of Abstracts of Reviews of Effects (DARE) and Health Technology Assessment  
24 (HTA) Database from 1990 to March 2013. See Appendix 1 for search strategies. The  
25 PROSPERO database was searched to identify any ongoing systematic reviews. Systematic  
26 reviews evaluating enhanced recovery programmes in patients undergoing any type of  
27 elective surgery in a hospital setting in the UK NHS or a comparable healthcare system were  
28 eligible for inclusion in the rapid evidence synthesis. Review authors' definitions of enhanced  
29 recovery programmes were accepted. Outcomes of interest were any measure of clinical  
30 outcomes, patient experience or resource use. Reviews had to compare enhanced recovery  
31 with usual/standard care without a structured multimodal enhanced recovery pathway. For  
32 this methodological study, only systematic reviews of enhanced recovery programmes for  
33 colorectal surgery were considered.  
34  
35  
36  
37  
38  
39  
40  
41

### 42 43 *Study selection*

44  
45  
46 We stored the literature search results in a reference management database (EndNote X6).  
47 Two researchers independently screened all titles and abstracts obtained through the  
48 searches for potentially relevant articles. Full manuscripts of potentially relevant articles were  
49 ordered and two researchers independently assessed the relevance of each article using the  
50 criteria stated above. Disagreements between researchers were resolved by discussion or  
51 by recourse to a third researcher where necessary.  
52  
53  
54  
55  
56  
57  
58  
59  
60

### *Quality assessment*

Quality assessment of systematic reviews was based on the CRD critical appraisal processes for DARE (<http://www.crd.york.ac.uk/crdweb/HomePage.asp>). Specific aspects assessed were adequacy of the search; assessment of quality/risk of bias of included studies; quality assessment results taken into account in the analysis; study details reported and differences between studies accounted for; investigation of statistical heterogeneity; were gaps in research identified; and were the review conclusions justified. The quality assessment was performed by one researcher and checked by a second. Discrepancies were resolved by discussion or by recourse to a third researcher.

### *Data extraction and analysis*

Clinical effectiveness data for the rapid evidence synthesis were extracted into review software (EPPI Reviewer 4.0). An analysis plan for this methodological study was prepared in advance and additional methodological information was extracted into a Microsoft Excel spreadsheet. Data were extracted by one researcher and checked by another; discrepancies were resolved by consensus or where necessary by recourse to a third researcher.

Data extracted from the reviews included the systematic review inclusion criteria (particularly the definition of an ERAS programme); RCTs included (number and list); length of stay mean difference (MD) estimates and 95% confidence intervals (CIs) for each RCT as reported in the review; meta-analysis methods (e.g. type of model used); method used to handle missing means/SDs; definition of primary and total length of stay; pooled estimates of weighted MD (WMD) in length of stay between ERAS and control groups; and source of funding.

Extracted data were examined and tabulated to identify differences between reviews that may have influenced their conclusions and quantitative estimates of the effectiveness of enhanced recovery programmes compared with usual care. We focused on the outcome of length of primary hospital stay (and total length of stay including readmissions, where reported) because reduction of length of stay is a key objective of enhanced recovery programmes and because length of stay was a primary outcome of most included systematic reviews. Only length of stay data from randomised controlled trials (RCTs) were included in this analysis.

## Results

The report by Paton et al. included 11 systematic reviews of ERAS programmes for colorectal surgery. One review(4) focused on quality of life and patient satisfaction and another on compliance and variations in practice(5), leaving nine reviews that reported length of stay, of which seven reported a pooled effect estimate (weighted mean difference (WMD) in days). The review by Zhuang et al.,(6) which was published too late to be fully discussed by Paton et al., is also included in this report, giving a total of ten systematic reviews that met the inclusion criteria for this methodological study (Table 1).

Most of the included reviews were reasonably well conducted and reported (Table 2). The reviews by Wind et al., (7) Walter et al. (8), Spanjersberg et al. (9) and Zhuang et al. (6) met all seven quality criteria and were considered at low risk of bias. Three other reviews met six criteria but all failed to take study quality into account in their synthesis.(10-12) Adamina et al. (13) and Lv et al. (14) failed to meet two of the criteria, while the paper by Rawlinson et al. (15) only clearly met two criteria and was considered potentially at high risk of bias.

### *Chronological development of the evidence base*

Four systematic reviews were published in the years 2006–2009. At this stage only a few randomised trials were available. Wind et al. Wind 2006(7) included three trials; Eskicioglu et al. and Gouvas et al. four trials; and Walter et al. included just two trials (Table 1).

Four further reviews were published in 2010 and 2011. These all considered the same six trials, although one review chose to exclude two of these from its main analysis because the intervention did not meet the review definition of an ERAS programme. (9)

A systematic review by Lv et al. published in 2012 added one more trial, bringing the total to seven. However, just a year later Zhuang et al. published a systematic review with 13 included trials, among them four recent trials by Chinese investigators. With one exception,(16) the trials included in this review were identified and discussed by Paton et al. in our review of trials not included in the then-available systematic reviews.

The included reviews varied somewhat in the extent to which they cited previously published reviews of the field. However, in general reviews tended to cite most of the earlier reviews that would have been available at the time of writing. The first systematic review, by Wind et



1  
2  
3 al., was cited by eight of the nine subsequent reviews. Gouvas et al.'s review was cited by  
4 six of seven subsequent reviews and Varadhan et al. by four out of five (Table 3). The main  
5 exception was the paper by Rawlinson et al.,(15) which was not cited by three later reviews.  
6 Adamina et al. differed from other researchers in their use of Bayesian methodology and  
7 their work was only cited by one of the four later reviews. Zhuang et al. cited all the previous  
8 systematic reviews except that of Lv et al., which may have been published too late to be  
9 included.  
10  
11  
12

### 13 14 15 *Methodological differences between systematic reviews*

16  
17  
18 The four early systematic reviews of ERAS for colorectal surgery showed a number of  
19 methodological differences. Although inclusion criteria appeared similar, Walter et al.  
20 excluded two trials that were included in the reviews by Eskicioglu et al. and Gouvas et al. In  
21 one case(17) this was reported to be because the trial included some patients who had  
22 undergone small bowel surgery; the reason for the other exclusion(18) was not reported.  
23 Walter et al. also differed from the other reviews in its definition of outcomes: length of stay  
24 was measured as total days of admission in this review and as days spent in hospital after  
25 surgery in the other reviews published in the same period.  
26  
27  
28  
29  
30  
31

32 In terms of data synthesis, Eskicioglu et al. was the only one of the four early reviews that  
33 did not perform a meta-analysis, on the grounds that data in the right form (means and  
34 standard deviations) were not available. The remaining three reviews elected to pool.  
35 Gouvas et al. and Wind et al. used random-effects models for their main meta-analysis,  
36 while Walter et al. used a fixed-effect model. Both Wind et al. and Walter et al. justified their  
37 choice on the basis of a random-effects model being more appropriate in the presence of  
38 some heterogeneity but neither stated a level of heterogeneity above which a random-effects  
39 model should be used. Wind et al. stated that trials without means and standard deviations  
40 were omitted from the analysis, while Gouvas et al. estimated from reported medians and  
41 ranges where necessary. Walter et al. did not report on this point.  
42  
43  
44  
45  
46  
47  
48

49 Pooled estimates (WMD) of the effect of ERAS on primary length of stay varied substantially,  
50 being considerably higher and with a wider confidence interval in Walter et al. compared with  
51 the other reviews (Figure 1 and Table 4). Wind et al. and Gouvas et al. provided almost  
52 identical WMDs, the only effect of an additional trial in Gouvas et al. being to slightly narrow  
53 the 95% confidence interval. Walter et al. reported no statistical heterogeneity while the  
54 other two reviews found some evidence of heterogeneity.  
55  
56  
57  
58  
59  
60

1  
2  
3 Overall, these reviews suggested considerable uncertainty about the magnitude of the effect  
4 of ERAS programmes in reducing length of hospital stay. Based on 95% confidence  
5 intervals, the effect could plausibly range from less than 0.5 days to almost 5 days.  
6  
7

8  
9 The next group of systematic reviews to be published(9, 12, 13, 15) included up to six RCTs  
10 (additional RCTs by Muller et al. (19) and Serclova et al. (20) were now available).  
11 Spanjersberg et al. differed from other authors in treating length of stay as a secondary  
12 outcome of the review and more significantly by excluding two trials that were included in  
13 most other systematic reviews. The authors stated that Muller et al. and Delaney et al. (17)  
14 failed to meet the inclusion criterion of including at least seven elements in the ERAS  
15 intervention.  
16  
17  
18  
19

20  
21 None of these reviews provided clear definitions of outcomes but Varadhan et al. and  
22 Spanjersberg et al. appeared to measure days in hospital after surgery (i.e., primary length  
23 of stay). Adamina et al. reported their outcome as length of hospital stay without definition or  
24 distinguishing between primary and total length of stay. The reviews also differed in their  
25 reported treatment of studies with missing data (mean/standard deviation): Varadhan et al.  
26 obtained data from original authors, Spanjersberg et al. calculated from median and range  
27 and Adamina et al. did not report their methods. Adamina et al. were the only authors who  
28 used Bayesian methods for meta-analysis, although few details were reported. (13)  
29 Rawlinson et al. (15) did not report an original meta-analysis but instead discussed the  
30 findings of Gouvas et al. and Varadhan et al.  
31  
32  
33  
34  
35  
36  
37

38 Compared with the earlier reviews, this group of systematic reviews reported a substantially  
39 narrower range of effect estimates, all suggesting a reduction of 2.5 to 3 days in primary  
40 hospital stay associated with ERAS programmes (Table 1). The range of 95% confidence  
41 intervals was also narrower (approximately 1.1 to 3.9 days).  
42  
43  
44

45  
46 The 2012 review by Lv et al. added one additional RCT for a total of seven trials. (14) The  
47 new trial(21) compared ERAS with traditional care in patients undergoing both laparoscopic  
48 and open surgery and so was treated as two trials in the meta-analysis. The trial showed a 1  
49 day reduction in length of stay in the laparoscopic setting but there was no difference in  
50 patients undergoing open surgery. Lv et al. also differed from most of the earlier reviews in  
51 defining length of stay as length of the index admission (rather than days in hospital after  
52 surgery). It is unclear whether this explains the discrepancy but Lv et al. reported a smaller  
53 reduction in length of stay compared with the reviews immediately preceding it (-1.88 days,  
54  
55  
56  
57  
58  
59  
60

1  
2  
3 95% CI -2.91 to -0.86). However, this estimate was still compatible with a 'true' reduction of  
4 around 2 to 3 days in primary length of stay.  
5  
6

7  
8 The most recent systematic review that we are aware of was published in May 2013, too late  
9 to be considered in detail in the full report.(6) It is more comprehensive than the previous  
10 reviews, with 13 included trials (two with both open and laparoscopic arms) and 1910  
11 participants. All except one(22) of the RCTs included in our report were also in this  
12 systematic review. However, Zhuang et al. also included one trial that we excluded.(16) In  
13 fact this publication is a single-centre report of results from the LAFA trial that was reported  
14 in full by Vlug et al.(21) so it is likely that there was double-counting of these patients in  
15 Zhuang et al.'s meta-analyses. However, this publication was not included in the meta-  
16 analysis of length of stay outcomes.  
17  
18  
19  
20  
21

22  
23 Some of the trials included for the first time in Zhuang et al.'s review, particularly that of  
24 Ionescu et al. (2009), were available to earlier systematic reviewers. Of the reviews  
25 published in 2010 or later, Varadhan et al. did not give references for any excluded studies.  
26 Adamina et al. gave references for excluded studies but did not list Ionescu et al.,  
27 suggesting that their search did not locate this trial. Rawlinson et al. did not list excluded  
28 studies, while the Cochrane review by Spanjersberg et al. did not list Ionescu et al. among  
29 the excluded studies. Lv et al. excluded 26 out of 33 studies examined in full text but did not  
30 report any details.  
31  
32  
33  
34  
35

36  
37 There was a discrepancy between Zhuang et al. and Lv et al. in their data extraction of the  
38 trial by Vlug et al. There were also minor data extraction discrepancies between these  
39 reviews for two other trials but as they were in opposite directions in the two cases this is  
40 unlikely to have had a major impact on the overall meta-analysis results.  
41  
42  
43

44  
45 Like most included reviews, Zhuang et al. defined length of stay as time in hospital after  
46 surgery. The pooled estimate of a 2.44 day reduction in primary length of stay (95% CI 1.83  
47 to 3.06) for ERAS relative to traditional care was very similar to those reported by Varadhan  
48 et al. (12) and Adamina et al. (13)  
49  
50  
51  
52  
53  
54  
55  
56  
57  
58  
59  
60

## Discussion

### *Main findings*

Systematic reviews of randomised trials have consistently shown a reduction in length of hospital stay with ERAS compared with traditional care. The estimated effect tended to increase over time from 2006 to 2010 as more trials were published but has not altered significantly in the most recent review, despite the inclusion of several unique trials. The best estimate appears to be an average reduction of around 2.5 days in primary post-operative length of hospital stay. However, there is considerable heterogeneity in most pooled estimates and the complexity of ERAS as an intervention means that the benefits achieved in routine practice may differ from those reported in clinical trials. These issues are discussed in the full project report (Paton et al., in preparation).

The published systematic reviews show a high level of redundancy, with multiple reviews covering identical or very similar groups of trials. Differences in pooled effect estimates across reviews reflect differences in interpretation of inclusion criteria, searching and analytical methods or software. A few data extraction discrepancies were observed but these are unlikely to have significantly affected review conclusions.

### *Findings in relation to previous studies*

The existence of multiple systematic reviews covering the same topic was investigated by Siontis et al.(23) They found that of 73 systematic reviews (with meta-analysis) published in 2010, 49 (67%) had at least one other published meta-analysis on the same topic. A particularly striking example was the existence of 11 meta-analyses of statins to prevent atrial fibrillation after cardiac surgery; all except the first of these showed a large positive effect of the intervention. Our findings reinforce those of Siontis et al., although even where reviews included exactly the same trials their pooled estimates of effect were not necessarily identical. Enhanced recovery differs from an intervention like statins after cardiac surgery, being more complex and changing over time as more elements are incorporated into routine practice. This would tend to favour increased variation between reviews along the lines we observed.

A slightly different approach to investigating overlap between systematic reviews was taken by Woodman et al., who looked at the differences between eight reviews of community interventions to promote physical activity.(24) Across the eight reviews there were 28

1  
2  
3 included studies, of which 22 (79%) were only included in one review. There was little cross-  
4 citation between reviews. For most reviews, Woodman et al. could explain why primary data  
5 were not included, which was usually due to the reviews having a relatively narrow scope.  
6 Despite these issues, the review conclusions were similar. Comparing our results with those  
7 of Woodman et al., the enhanced recovery reviews had a higher degree of overlap although  
8 they differed with respect to inclusion of non-randomised studies (not discussed in this  
9 paper). The differences between the enhanced recovery and physical activity reviews  
10 probably reflect the fact that enhanced recovery, although a complex intervention, is more  
11 narrowly defined than interventions to increase physical activity  
12  
13  
14  
15  
16

### 17 18 *Implications* 19

20  
21 The findings of this study have implications for systematic reviewers, readers of systematic  
22 reviews and producers of systematic review-based evidence products. Systematic reviewers  
23 can help readers compare their reviews with other similar studies by clear reporting of key  
24 decisions, especially on inclusion/exclusion and on statistical pooling. Most of the reviews of  
25 enhanced recovery programmes performed a meta-analysis to calculate a WMD in length of  
26 stay between enhanced recovery and usual care groups. Calculating the WMD requires the  
27 means and standard deviations (SDs) of length of stay in each group in the included trials,  
28 but trials often report a different measure such as median and range (or interquartile range).  
29 Systematic reviews can deal with this situation in different ways, for example by using  
30 formulae to estimate the mean and SD, contacting the trial authors or omitting trials from any  
31 meta-analysis if mean and SD are not reported. The enhanced recovery reviews adopted all  
32 of these approaches but did not report which data were estimated rather than derived  
33 directly from trial reports. Improved reporting in this area would improve transparency and  
34 help readers to understand discrepancies between apparently similar meta-analyses. Length  
35 of stay outcomes were not always clearly defined or reported and differences between  
36 reviews may in part stem from the fact that they were measuring an outcome in different  
37 ways.  
38  
39  
40  
41  
42  
43  
44  
45  
46  
47

48  
49 Readers of systematic reviews need to be aware of the existence of multiple systematic  
50 reviews for a high percentage of topics. This means they should not rely uncritically on the  
51 first review they find and underlines the importance of services that critically appraise  
52 systematic reviews and those that provide overviews of reviews across a topic area.<sup>(25, 26)</sup>  
53 As an aid to transparency, authors of new systematic reviews should also acknowledge the  
54 existence of any systematic reviews addressing the same or a similar question.  
55  
56  
57  
58  
59  
60

1  
2  
3 The use of systematic reviews to produce rapid evidence summaries to inform decision-  
4 making is an area where methodology is still developing, although some methodological  
5 frameworks have been published.(27, 28) Assessment of the quality and reliability of  
6 systematic reviews is an important part of this process but the present study suggests that  
7 conventional approaches to critical appraisal are not sufficient and careful attention should  
8 be paid to apparently minor differences between reviews. This may require increased  
9 extraction of methodological data even though the results may not be included in published  
10 evidence summaries aimed at decision-makers.  
11  
12  
13  
14  
15

### 16 *Strengths and limitations*

17  
18  
19  
20 The strength of this study is that we have looked in some detail at reviews of a complex  
21 clinical intervention to identify differences between them and possible explanations, such as  
22 differences in intervention and outcome definitions and handling of missing data from  
23 included trials in meta-analyses. We have identified limitations in reporting as one of the  
24 main barriers to understanding differences between reviews of the same topic. These  
25 reporting issues have often limited our ability to comment on whether decisions taken by  
26 review authors appear to be 'right' or 'wrong'. The discrepancies between reviews identified  
27 in this study sometimes arose from decisions where both options could be considered  
28 reasonable, for example whether or not to exclude the trial by Delaney et al.(17) because a  
29 small number of patients undergoing small bowel surgery were included.  
30  
31  
32  
33  
34  
35

36 This study only considered length of stay outcomes. Length of stay was selected as the  
37 primary outcome because of its importance for the health service at a time of acute financial  
38 pressure and because it was an outcome considered in all the included systematic reviews.  
39 Other important outcomes, including morbidity and mortality, are discussed in the full report  
40 (Paton et al., in preparation).  
41  
42  
43  
44

### 45 *Unanswered questions/further research*

46  
47  
48 The current study suggests a need for further, more in-depth research into methods of  
49 quality assessment of systematic reviews; to make the best use of a cumulative evidence  
50 base for decision-making; and to identify methodological issues and decision points that may  
51 influence the eventual conclusions of a review. These issues are particularly important for  
52 researchers seeking to help decision-makers interpret and use systematic reviews.  
53 Enhanced recovery is a complex intervention with multiple components and its successful  
54 implementation is likely to be influenced by numerous background factors. Given this  
55  
56  
57  
58  
59  
60

1  
2  
3 background, researchers and clinicians carrying out new systematic reviews should ensure  
4 that their chosen method of synthesis is appropriate for exploring intervention complexity.  
5 The recently published research agenda for reviews of complex interventions(29) provides  
6 timely guidance in this regard. Ideally, systematic reviews of emerging complex interventions  
7 (for example, interventions to support integration of health and social care) should use  
8 standardised methods and outcome definitions and be regularly updated, although this may  
9 be difficult to achieve in practice.  
10  
11  
12

13  
14  
15 Systematic reviews of enhanced recovery programmes in colorectal surgery continue to be  
16 published and we are aware of at least two publications since our search was  
17 completed.(30, 31) The authors of one of these reviews refer to their paper as ‘a substantial  
18 update from previous meta-analyses’(30) but in fact the included trials and overall findings  
19 are almost identical to those of Zhuang et al.(6) This is not the fault of the authors but  
20 represents an avoidable waste of research resources. Systematic reviews are now  
21 increasingly being registered prospectively at the outset on databases such as  
22 PROSPERO(32) and it will be interesting to see whether the production of overlapping  
23 reviews decreases over time.  
24  
25  
26  
27  
28  
29

30 **Word count (main text): 3973**  
31  
32  
33  
34  
35  
36  
37  
38  
39  
40  
41  
42  
43  
44  
45  
46  
47  
48  
49  
50  
51  
52  
53  
54  
55  
56  
57  
58  
59  
60



1  
2  
3 **Contributors:** All authors contributed to the design of this methodological study and  
4 commented on the analysis plan and/or draft manuscript. PW took overall responsibility for  
5 the rapid evidence synthesis and is guarantor. D Chambers and FP extracted additional  
6 methodological data. D Chambers wrote the first draft of the paper. All authors have seen  
7 and approved the final version.  
8  
9

10  
11 **Competing interests:** All authors have completed the ICMJE uniform disclosure form at  
12 [www.icmje.org/coi\\_disclosure.pdf](http://www.icmje.org/coi_disclosure.pdf) and declare: no support from any organisation for the  
13 submitted work; no financial relationships with any organisations that might have an interest  
14 in the submitted work in the previous three years; no other relationships or activities that  
15 could appear to have influenced the submitted work.  
16  
17  
18

19  
20 **Transparency declaration:** The lead author (the manuscript's guarantor) affirms that this  
21 manuscript is an honest, accurate, and transparent account of the study being reported; that  
22 no important aspects of the study have been omitted; and that any discrepancies from the  
23 study as planned (and, if relevant, registered) have been explained.  
24  
25  
26  
27

28 *The Corresponding Author has the right to grant on behalf of all authors and does grant on*  
29 *behalf of all authors, a worldwide licence*  
30 *(<http://www.bmj.com/sites/default/files/BMJ%20Author%20Licence%20March%202013.doc>)*  
31 *to the Publishers and its licensees in perpetuity, in all forms, formats and media (whether*  
32 *known now or created in the future), to i) publish, reproduce, distribute, display and store the*  
33 *Contribution, ii) translate the Contribution into other languages, create adaptations, reprints,*  
34 *include within collections and create summaries, extracts and/or, abstracts of the*  
35 *Contribution and convert or allow conversion into any format including without limitation*  
36 *audio, iii) create any other derivative work(s) based in whole or part on the on the*  
37 *Contribution, iv) to exploit all subsidiary rights to exploit all subsidiary rights that currently*  
38 *exist or as may exist in the future in the Contribution, v) the inclusion of electronic links from*  
39 *the Contribution to third party material where-ever it may be located; and, vi) licence any*  
40 *third party to do any or all of the above. All research articles will be made available on an*  
41 *Open Access basis (with authors being asked to pay an open access fee—*  
42 *see [http://www.bmj.com/about-bmj/resources-authors/forms-policies-and-](http://www.bmj.com/about-bmj/resources-authors/forms-policies-and-checklists/copyright-open-access-and-permission-reuse)*  
43 *checklists/copyright-open-access-and-permission-reuse). The terms of such Open Access*  
44 *shall be governed by a [Creative Commons](http://creativecommons.org/licenses/by/4.0/) licence—details as to which Creative Commons*  
45 *licence will apply to the research article are set out in our worldwide licence referred to*  
46 *above.*  
47  
48  
49  
50  
51  
52  
53  
54  
55  
56  
57  
58  
59  
60



**Disclaimer:**

This report presents independent research funded by the National Institute for Health Research (NIHR). The views expressed are those of the authors and do not necessarily reflect those of the NIHR Health Services and Delivery Research programme or the Department of Health.

**Acknowledgements:** This project was funded as part of a programme of research funded by the NIHR Health Services and Delivery Research programme (Project ref: 11/1026/04).

**Data sharing:** No additional data available.

**Figure legend**

Figure 1: Summary of pooled results for primary length of stay

## References

1. Enhanced Recovery Partnership Programme. Delivering enhanced recovery – Helping patients to get better sooner after surgery. London: Department of Health, 2010 March 31st.
2. Kehlet H, Wilmore DW. Multimodal strategies to improve surgical outcome. *Am J Surg.* 2002 Jun;183(6):630-41.
3. Sturm L, Cameron AL. Brief review: Fast-track surgery and enhanced recovery after surgery (ERAS) programs. Melbourne: Australian Safety and Efficacy Register of New Interventional Procedures - Surgical (ASERNIP-S), 2009 Contract No.: 3.
4. Khan S, Wilson T, Ahmed J, et al. Quality of life and patient satisfaction with enhanced recovery protocols. *Colorectal Dis.* 2010;12(12):1175-82.
5. Ahmed J, Khan S, Lim M, et al. Enhanced recovery after surgery protocols - compliance and variations in practice during routine colorectal surgery. *Colorectal Dis.* 2012;14(9):1045-51.
6. Cheng-Le Z, Xing-Zhao YX-D, Z., Bi-Cheng C, et al. Enhanced recovery after surgery programs versus traditional care for colorectal surgery: A meta-analysis of randomized controlled trials. *Dis Colon Rectum.* 2013;56:667-78.
7. Wind J, Polle SW, Fung Kon Jin PH, et al. Systematic review of enhanced recovery programmes in colonic surgery. *Br J Surg.* 2006;93(7):800-9.
8. Walter CJ, Collin J, Dumville JC, et al. Enhanced recovery in colorectal resections: a systematic review and meta-analysis. *Colorectal Dis.* 2009 May;11(4):344-53.
9. Spanjersberg Willem R, Reurings J, Keus F, et al. Fast track surgery versus conventional recovery strategies for colorectal surgery. *Cochrane Database of Systematic Reviews.* 2011 (2).
10. Eskicioglu C, Forbes SS, Aarts M-A, et al. Enhanced Recovery after Surgery (ERAS) programs for patients having colorectal surgery: a meta-analysis of randomized trials. *J Gastrointest Surg.* 2009 Dec;13(12):2321-9.
11. Gouvas N, Tan E, Windsor A, et al. Fast-track vs standard care in colorectal surgery: a meta-analysis update. *Int J Colorectal Dis.* 2009 Oct;24(10):1119-31.
12. Varadhan KK, Neal KR, Dejong CH, et al. The enhanced recovery after surgery (ERAS) pathway for patients undergoing major elective open colorectal surgery: a meta-analysis of randomized controlled trials. *Clin Nutr.* 2010;29(4):434-40.
13. Adamina M, Kehlet H, Tomlinson GA, et al. Enhanced recovery pathways optimize health outcomes and resource utilization: a meta-analysis of randomized controlled trials in colorectal surgery. *Surgery.* 2011;149(6):830-40.
14. Lv L, Shao Y-f, Zhou Y-b. The enhanced recovery after surgery (ERAS) pathway for patients undergoing colorectal surgery: an update of meta-analysis of randomized controlled trials. *Int J Colorectal Dis.* 2012;27:1549–54.
15. Rawlinson A, Kang P, Evans J, et al. A systematic review of enhanced recovery protocols in colorectal surgery. *Ann R Coll Surg Engl.* 2011;93(8):583-8.
16. van Bree SH, Vlug MS, Bemelman WA, et al. Faster recovery of gastrointestinal transit after laparoscopy and fast-track care in patients undergoing colonic surgery. *Gastroenterology.* 2011 Sep;141(3):872-80.e1-4.
17. Delaney CP, Zutshi M, Senagore AJ, et al. Prospective, randomized, controlled trial between a pathway of controlled rehabilitation with early ambulation and diet and traditional postoperative care after laparotomy and intestinal resection. *Dis Colon Rectum.* 2003 Jul;46(7):851-9.
18. Khoo CK, Vickery CJ, Forsyth N, et al. A prospective randomized controlled trial of multimodal perioperative management protocol in patients undergoing elective colorectal resection for cancer. *Ann Surg.* 2007 Jun;245(6):867-72.
19. Muller S, Zalunardo MP, Hubner M, et al. A fast-track program reduces complications and length of hospital stay after open colonic surgery. *Gastroenterology.* 2009 Mar;136(3):842-7.

- 1
- 2
- 3 20. Serclova Z, Dytrych P, Marvan J, et al. Fast-track in open intestinal surgery:  
4 prospective randomized study (Clinical Trials Gov Identifier no. NCT00123456). *Clin Nutr*.  
5 2009 Dec;28(6):618-24.
- 6 21. Vlug MS, Wind J, Hollmann MW, et al. Laparoscopy in combination with fast track  
7 multimodal management is the best perioperative strategy in patients undergoing colonic  
8 surgery: a randomized clinical trial (LAFa-study). *Ann Surg*. 2011 Dec;254(6):868-75.
- 9 22. Lee TG, Kang SB, Kim DW, et al. Comparison of early mobilization and diet  
10 rehabilitation program with conventional care after laparoscopic colon surgery: a prospective  
11 randomized controlled trial. *Dis Colon Rectum*. 2011 Jan;54(1):21-8.
- 12 23. Siontis KC, Hernandez-Boussard T, Ioannidis JP. Overlapping meta-analyses on the  
13 same topic: survey of published studies. *BMJ*. 2013;347:f4501.
- 14 24. Woodman J, Thomas J, Dickson K. How explicable are differences between reviews  
15 that appear to address a similar research question? A review of reviews of physical activity  
16 interventions. *Systematic reviews*. 2012;1:37.
- 17 25. Chambers D, Wilson P, Thompson C, et al. Maximizing the impact of systematic  
18 reviews in healthcare decision-making: a systematic scoping review of knowledge translation  
19 resources. *Milbank Q*. 2011;89(1):131-56.
- 20 26. Lavis JN. How can we support the use of systematic reviews in policymaking? *PLoS*  
21 *Medicine*. 2009;6(11):e1000141.
- 22 27. Chambers D, Wilson P. A framework for production of systematic review based  
23 briefings to support evidence-informed decision-making. *Systematic reviews*. 2012;1:32.
- 24 28. Khangura S, Konnyu K, Cushman R, et al. Evidence summaries: the evolution of a  
25 rapid review approach. *Systematic reviews*. 2012;1:10.
- 26 29. Noyes J, Gough D, Lewin S, et al. A research and development agenda for  
27 systematic reviews that ask complex questions about complex interventions. *J Clin*  
28 *Epidemiol*. 2013 Nov;66(11):1262-70.
- 29 30. Greco M, Capretti G, Beretta L, et al. Enhanced Recovery Program in Colorectal  
30 Surgery: A Meta-analysis of Randomized Controlled Trials. *World J Surg*. 2013 Dec 25.
- 31 31. Gianotti L, Beretta S, Luperto M, et al. am required to achieve the target? *Int J*  
32 *Colorectal Dis*. 2013 Dec 13.
- 33 32. Booth A, Clarke M, Dooley G, et al. PROSPERO at one year: an evaluation of its  
34 utility. *Systematic reviews*. 2013;2:4.
- 35 33. Anderson AD, McNaught CE, MacFie J, et al. Randomized clinical trial of multimodal  
36 optimization and standard perioperative surgical care. *Br J Surg*. 2003 Dec;90(12):1497-504.
- 37 34. Gatt M, Anderson AD, Reddy BS, et al. Randomized clinical trial of multimodal  
38 optimization of surgical care in patients undergoing major colonic resection. *Br J Surg*. 2005  
39 Nov;92(11):1354-62.
- 40 35. Ionescu D, Iancu C, Ion D, et al. Implementing fast-track protocol for colorectal  
41 surgery: a prospective randomized clinical trial. *World J Surg*. 2009 Nov;33(11):2433-8.
- 42 36. Garcia-Botello S, Canovas de Lucas R, Tornero C, et al. Implementation of a  
43 perioperative multimodal rehabilitation protocol in elective colorectal surgery. A prospective  
44 randomised controlled study. *Cir Esp*. 2011 Mar;89(3):159-66.
- 45 37. Ren L, Zhu D, Wei Y, et al. Enhanced Recovery After Surgery (ERAS) program  
46 attenuates stress and accelerates recovery in patients after radical resection for colorectal  
47 cancer: a prospective randomized controlled trial. *World J Surg*. 2012 Feb;36(2):407-14.
- 48 38. Wang G, Jiang Z, Zhao K, et al. Immunologic response after laparoscopic colon  
49 cancer operation within an enhanced recovery program. *J Gastrointest Surg*. 2012  
50 Jul;16(7):1379-88.
- 51 39. Wang Q, Suo J, Jiang J, et al. Effectiveness of fast-track rehabilitation vs  
52 conventional care in laparoscopic colorectal resection for elderly patients: a randomized trial.  
53 *Colorectal Dis*. 2012 Aug;14(8):1009-13.
- 54 40. Yang D, He W, Zhang S, et al. Fast-track surgery improves postoperative clinical  
55 recovery and immunity after elective surgery for colorectal carcinoma: randomized controlled  
56 clinical trial. *World J Surg*. 2012 Aug;36(8):1874-80.
- 57
- 58
- 59
- 60

Table 1: Overview of systematic reviews of ERAS for colorectal surgery

| Review               | Minimum definition of ERAS intervention                          | Search cut-off date     | Included RCTs                                                                                                                                                                                                             |
|----------------------|------------------------------------------------------------------|-------------------------|---------------------------------------------------------------------------------------------------------------------------------------------------------------------------------------------------------------------------|
| Wind 2006(7)         | At least four elements required                                  | December 2005           | Anderson 2003(33); Delaney 2003(17); Gatt 2005(34)                                                                                                                                                                        |
| Eskicioglu 2009(10)  | Not stated                                                       | May 2008                | Anderson 2003(33); Delaney 2003(17); Gatt 2005(34); Khoo 2007(18)                                                                                                                                                         |
| Gouvas 2009(11)      | At least four elements required                                  | July 2008               | Anderson 2003(33); Delaney 2003(17); Gatt 2005(34); Khoo 2007(18)                                                                                                                                                         |
| Walter 2009(8)       | At least five elements required (pre-, peri- and post-operative) | January 2007            | Anderson 2003(33); Gatt 2005(34)                                                                                                                                                                                          |
| Varadhan 2010(12)    | At least four elements required (pre-, peri- and post-operative) | November 2009           | Anderson 2003(33); Delaney 2003(17); Gatt 2005(34); Khoo 2007(18); Muller 2009(19); Serclova 2009(20)                                                                                                                     |
| Adamina 2011(13)     | Documented compliance with at least four of five key elements    | June 2010               | Anderson 2003(33); Delaney 2003(17); Gatt 2005(34); Khoo 2007(18); Muller 2009(19); Serclova 2009(20)                                                                                                                     |
| Rawlinson 2011(15)   | At least four elements required (pre-, peri- and post-operative) | February 2011           | Anderson 2003(33); Delaney 2003(17); Gatt 2005(34); Khoo 2007(18); Muller 2009(19); Serclova 2009(20)                                                                                                                     |
| Spanjersberg 2011(9) | At least seven elements required                                 | Unclear (January 2011?) | Anderson 2003(33); Gatt 2005(34); Khoo 2007(18); Serclova 2009(20)                                                                                                                                                        |
| Lv 2012(14)          | Not stated                                                       | April 2012              | Anderson 2003(33); Delaney 2003(17); Gatt 2005(34); Khoo 2007(18); Muller 2009(19); Serclova 2009(20); Vlug 2011(21)                                                                                                      |
| Zhuang 2013.(6)      | At least seven elements required                                 | July 2012               | Anderson 2003(33); Gatt 2005(34); Khoo 2007(18); Muller 2009(19); Serclova 2009(20); Ionescu 2009(35); Vlug 2011(21)Garcia-Botello 2011(36); Bree 2011(16); Ren 2012(37); G Wang 2012(38); Q Wang 2012(39); Yang 2012(40) |

Table 2: Risk of bias in included systematic reviews

| Review | Adequate search | Risk of bias assessed | Quality score accounted for in | Study details reported and | Statistical heterogeneity investigate | Gaps in research identify | Conclusions justified |
|--------|-----------------|-----------------------|--------------------------------|----------------------------|---------------------------------------|---------------------------|-----------------------|
|--------|-----------------|-----------------------|--------------------------------|----------------------------|---------------------------------------|---------------------------|-----------------------|

|                      |   |   | analysis | differences accounted for | d  | d |    |
|----------------------|---|---|----------|---------------------------|----|---|----|
| Wind 2006(7)         | ✓ | ✓ | ✓        | ✓                         | ✓  | ✓ | ✓  |
| Eskicioglu 2009(10)  | ✓ | ✓ | x        | ✓                         | ✓  | ✓ | ✓  |
| Gouvas 2009(11)      | ✓ | ✓ | x        | ✓                         | ✓  | ✓ | ✓  |
| Walter 2009(8)       | ✓ | ✓ | ✓        | ✓                         | ✓  | ✓ | ✓  |
| Varadhan 2010(12)    | ✓ | ✓ | x        | ✓                         | ✓  | ✓ | ✓  |
| Adamina 2011(13)     | ✓ | ✓ | UC       | ✓                         | UC | ✓ | ✓  |
| Rawlinson 2011(15)   | ✓ | x | x        | ✓                         | UC | x | UC |
| Spanjersberg 2011(9) | ✓ | ✓ | ✓        | ✓                         | ✓  | ✓ | ✓  |
| Lv 2012(14)          | ✓ | ✓ | x        | x                         | ✓  | ✓ | ✓  |
| Zhuang 2013.(6)      | ✓ | ✓ | ✓        | ✓                         | ✓  | ✓ | ✓  |

UC, unclear

Table 3: Cross-citation among included systematic reviews

| Review               | Reviews cited                                                                                                                 | Cited by subsequent reviews                                                                                                                          |
|----------------------|-------------------------------------------------------------------------------------------------------------------------------|------------------------------------------------------------------------------------------------------------------------------------------------------|
| Wind 2006(7)         | NA                                                                                                                            | Eskicioglu 2009(10); Gouvas 2009(11); Walter 2009(8); Varadhan 2010(12); Adamina 2011(13); Rawlinson 2011(15); Spanjersberg 2011(9); Zhuang 2013.(6) |
| Eskicioglu 2009(10)  | Wind 2006(7)                                                                                                                  | Varadhan 2010(12); Rawlinson 2011(15); Zhuang 2013.(6)                                                                                               |
| Gouvas 2009(11)      | Wind 2006(7)                                                                                                                  | Varadhan 2010(12); Adamina 2011(13); Rawlinson 2011(15); Spanjersberg 2011(9); Lv 2012(14); Zhuang 2013.(6)                                          |
| Walter 2009(8)       | Wind 2006(7)                                                                                                                  | Varadhan 2010(12); Spanjersberg 2011(9); Lv 2012(14); Zhuang 2013.(6)                                                                                |
| Varadhan 2010(12)    | Wind 2006(7); Eskicioglu 2009(10); Gouvas 2009(11); Walter 2009(8)                                                            | Rawlinson 2011(15); Spanjersberg 2011(9); Lv 2012(14); Zhuang 2013.(6)                                                                               |
| Adamina 2011(13)     | Wind 2006(7); Gouvas 2009(11)                                                                                                 | Zhuang 2013.(6)                                                                                                                                      |
| Rawlinson 2011(15)   | Wind 2006(7); Eskicioglu 2009(10); Gouvas 2009(11); Varadhan 2010(12)                                                         | Not cited                                                                                                                                            |
| Spanjersberg 2011(9) | Wind 2006(7); Gouvas 2009(11); Walter 2009(8); Varadhan 2010(12)                                                              | Lv 2012(14); Zhuang 2013.(6)                                                                                                                         |
| Lv 2012(14)          | Gouvas 2009(11); Walter 2009(8); Varadhan 2010(12); Spanjersberg 2011(9)                                                      | Not cited                                                                                                                                            |
| Zhuang 2013.(6)      | Wind 2006(7); Eskicioglu 2009(10); Gouvas 2009(11); Walter 2009(8); Varadhan 2010(12); Adamina 2011(13); Spanjersberg 2011(9) | NA                                                                                                                                                   |

NA, not applicable

Table 4: Summary of meta-analyses for length of stay

| Review               | Definition of primary length of stay                                    | Meta-analysis model | Pooled effect estimate for primary length of stay                                      | Pooled effect estimate for total length of stay |
|----------------------|-------------------------------------------------------------------------|---------------------|----------------------------------------------------------------------------------------|-------------------------------------------------|
| Wind 2006(7)         | Days in hospital after surgery                                          | Random              | WMD -1.89 (-3.61 to -0.18) $I^2 = 63.4\%$                                              | Not calculated                                  |
| Eskicioglu 2009(10)  | Days in hospital after surgery                                          | NA                  | Not calculated (authors stated pooling was not feasible)                               |                                                 |
| Gouvas 2009(11)      | Days in hospital after surgery                                          | Random              | WMD -1.88 (-3.35 to -0.41) $I^2 = 45\%$                                                | WMD -1.73 (-3.50 to 0.04) $I^2 = 0\%$           |
| Walter 2009(8)       | Days in hospital during index admission                                 | Fixed               | WMD -3.64 (-4.98 to -2.29) $I^2 = 0\%$                                                 | WMD -3.75 (-5.11 to -2.40) $I^2 = 0\%$          |
| Varadhan 2010(12)    | Not explicitly defined but appears to be days in hospital after surgery | Random              | WMD -2.51 (-3.54 to -1.47) $I^2 = 55\%$                                                | Not calculated                                  |
| Adamina 2011(13)     | Length of stay outcome not explicitly defined                           | Bayesian            | Mean difference for 'length of stay' - 2.5 (95% CrI -3.92 to -1.11) $I^2$ not reported |                                                 |
| Rawlinson 2011(15)   | Not defined                                                             | NA                  | Not calculated (authors cited findings from Gouvas and Varadhan)                       |                                                 |
| Spanjersberg 2011(9) | Not explicitly defined but appears to be days in hospital after surgery | Fixed               | WMD -2.94 (-3.69 to -2.19) $I^2 = 0\%$                                                 | Not calculated                                  |
| Lv 2012(14)          | Days in hospital during index admission                                 | Random              | WMD -1.88 (-2.91 to -0.86) $I^2 = 75\%$                                                | Not calculated                                  |
| Zhuang 2013.(6)      | Days in hospital after surgery                                          | Random              | WMD -2.44 (-3.06 to -1.83) $I^2 = 88\%$                                                | WMD -2.39 (-3.70 to -1.09) $I^2 = 85\%$         |

NA, not applicable



1  
2  
3  
4  
5  
6  
7  
8  
9  
10  
11  
12  
13  
14  
15  
16  
17  
18  
19  
20  
21  
22  
23  
24  
25  
26  
27  
28  
29  
30  
31  
32  
33  
34  
35  
36  
37  
38  
39  
40  
41  
42  
43  
44  
45  
46  
47  
48  
49  
50  
51  
52  
53  
54  
55  
56  
57  
58  
59  
60

For peer review only

1  
2  
3 **Effect of enhanced recovery programmes on length of hospital stay in colorectal**  
4 **surgery: a**  
5 **An overview and methodological assessment of systematic reviews and**  
6 **meta-analyses of enhanced recovery programmes in colorectal surgery**  
7  
8  
9

10 Duncan Chambers, Fiona Paton, Paul Wilson, Alison Eastwood, Dawn Craig, Dave Fox,  
11 David Jayne, Erika McGinnes  
12

13  
14  
15 Centre for Reviews and Dissemination, University of York D Chambers, F Paton, P Wilson,  
16 A Eastwood, D Craig, D Fox  
17

18  
19  
20 Leeds Teaching Hospitals NHS Trust, Leeds D Jayne, E McGinnes  
21

22  
23 Corresponding author: Duncan Chambers ([duncan.chambers@york.ac.uk](mailto:duncan.chambers@york.ac.uk))  
24

25 *The Corresponding Author has the right to grant on behalf of all authors and does grant on*  
26 *behalf of all authors, a worldwide licence*  
27

28 (<http://www.bmj.com/sites/default/files/BMJ%20Author%20Licence%20March%202013.doc>)  
29

30 *to the Publishers and its licensees in perpetuity, in all forms, formats and media (whether*  
31 *known now or created in the future), to i) publish, reproduce, distribute, display and store the*  
32 *Contribution, ii) translate the Contribution into other languages, create adaptations, reprints,*  
33 *include within collections and create summaries, extracts and/or, abstracts of the*  
34 *Contribution and convert or allow conversion into any format including without limitation*  
35 *audio, iii) create any other derivative work(s) based in whole or part on the on the*  
36 *Contribution, iv) to exploit all subsidiary rights to exploit all subsidiary rights that currently*  
37 *exist or as may exist in the future in the Contribution, v) the inclusion of electronic links from*  
38 *the Contribution to third party material where-ever it may be located; and, vi) licence any*  
39 *third party to do any or all of the above. All research articles will be made available on an*  
40 *Open Access basis (with authors being asked to pay an open access fee—*  
41 *see [http://www.bmj.com/about-bmj/resources-authors/forms-policies-and-](http://www.bmj.com/about-bmj/resources-authors/forms-policies-and-checklists/copyright-open-access-and-permission-reuse)*  
42 *checklists/copyright-open-access-and-permission-reuse). The terms of such Open Access*  
43 *shall be governed by a [Creative Commons](https://creativecommons.org/licenses/by/4.0/) licence—details as to which Creative Commons*  
44 *licence will apply to the research article are set out in our worldwide licence referred to*  
45 *above.*  
46  
47  
48  
49  
50  
51  
52  
53

54  
55 **Disclaimer:**  
56  
57  
58  
59  
60

1  
2  
3  
4  
5  
6  
7  
8  
9  
10  
11  
12  
13  
14  
15  
16  
17  
18  
19  
20  
21  
22  
23  
24  
25  
26  
27  
28  
29  
30  
31  
32  
33  
34  
35  
36  
37  
38  
39  
40  
41  
42  
43  
44  
45  
46  
47  
48  
49  
50  
51  
52  
53  
54  
55  
56  
57  
58  
59  
60

This report presents independent research funded by the National Institute for Health Research (NIHR). The views expressed are those of the authors and do not necessarily reflect those of the NIHR Health Services and Delivery Research programme or the Department of Health.

**Acknowledgements:** This project was funded as part of a programme of research funded by the NIHR Health Services and Delivery Research programme (Project ref: 11/1026/04).

For peer review only

## Abstract

**Objectives:** To identify and critically assess the extent to which systematic reviews of enhanced recovery programmes for patients undergoing colorectal surgery differ in their methodology and reported estimates of ~~the~~ effect.

**Design:** Review of published systematic reviews. We searched the Cochrane Database of Systematic Reviews, the Database of Abstracts of Reviews of Effects (DARE) and Health Technology Assessment (HTA) Database from 1990 to March 2013. Systematic reviews of enhanced recovery programmes for patients undergoing colorectal surgery were eligible for inclusion.

**Primary and secondary outcome measures:** The primary outcome was length of hospital stay. We assessed changes in pooled estimates of treatment effect over time and how these might have been influenced by decisions taken by researchers as well as by the availability of new trials. The quality of systematic reviews was assessed using the CRD DARE critical appraisal process.

**Results:** Ten systematic reviews were included. Systematic reviews of RCTs have consistently shown a reduction in length of hospital stay with enhanced recovery compared with traditional care. The estimated effect tended to increase from 2006 to 2010 as more trials were published but has not altered significantly in the most recent review, despite the inclusion of several unique trials. The best estimate appears to be an average reduction of around 2.5 days in primary post-operative length of stay. Differences between reviews reflected differences in interpretation of inclusion criteria, searching and analytical methods or software.

**Conclusions:** Systematic reviews of enhanced recovery programmes show a high level of research waste, with multiple reviews covering identical or very similar groups of trials. Where multiple reviews exist on a topic, interpretation may require careful attention to apparently minor differences between reviews. Researchers can help readers by acknowledging existing reviews and through clear reporting of key decisions, especially on inclusion/exclusion and on statistical pooling.

**Word count: 298**

## Strengths and limitations

- Systematic reviews of randomised trials have consistently shown that enhanced recovery programmes reduce length of hospital stay for patients undergoing colorectal surgery, compared with usual care. The strength of this study is that we have looked in some detail at the available reviews to identify differences between them and possible explanations, such as differences in intervention and outcome definitions and handling of missing data from included trials in meta-analyses.
- We found a high level of research waste, with multiple reviews covering identical or very similar groups of trials. Differences in pooled effect estimates across reviews reflected differences in interpretation of inclusion criteria, searching and analytical methods or software.
- Where multiple reviews exist on a topic, interpretation may require careful attention to apparently minor differences between reviews. Researchers can help readers by acknowledging existing reviews and through clear reporting of key decisions, especially on inclusion/exclusion and on statistical pooling.
- We identified limitations in reporting as one of the main barriers to understanding differences between reviews. These reporting issues often limited our ability to comment on whether decisions taken by review authors appear to be right' or 'wrong'.

## Introduction

Reduction in length of stay in secondary care hospital settings provides a key potential opportunity to improve productivity in healthcare systems. There has been growing interest over recent years in the use of enhanced recovery programmes (also known as ERAS, fast track, multimodal, rapid or accelerated recovery programmes). The approach was pioneered in Denmark in the late 1990s for patients undergoing colorectal surgery and is now spreading to other surgical pathways such as musculoskeletal, urology and gynaecology.

The underlying aim of enhanced recovery programmes is to ensure that patients are in optimal condition for treatment (to minimise the risk of surgery being postponed or cancelled because of the patient's condition), receive innovative care during surgery and experience optimal post-surgical rehabilitation.<sup>(1)</sup> Programmes differ widely but share common elements such as patient education and involvement in preoperative planning processes, preoperative oral carbohydrates, improved anaesthetic and postoperative analgesic techniques to reduce the physical stress of the operation, early oral feeding and mobilisation.<sup>(2, 3)</sup> Enhanced recovery programmes have been delivered in the UK NHS since the early 2000s. Implementation has to date been variable despite the support of the Department of Health and more recently the Royal Colleges. It is likely that this variation reflects both the complexity of enhanced recovery programmes themselves and issues around implementing change in fundamental surgical procedures at a time when the NHS is facing severe funding constraints.

There are a substantial number of systematic reviews and economic evaluations that examine the effectiveness and cost-effectiveness of enhanced recovery programmes. We have used this evidence as the basis of a comprehensive rapid evidence synthesis relating to the effectiveness, cost effectiveness, implementation, delivery and impact of enhanced recovery programmes with particular reference to secondary care hospital settings in the NHS (Paton et al., in preparation). During the course of this project we became aware of significant methodological differences between systematic reviews of enhanced recovery programmes in colorectal surgery (by far the largest body of evidence for any surgical speciality). Reviews published at around the same time varied in the trials they included and in their estimates (derived by meta-analysis) of the reduction in length of stay associated with enhanced recovery programmes.

1  
2  
3 The objective of this study, therefore, is to provide a critical overview of the methodology of  
4 the available systematic reviews and their contribution to the development of the evidence  
5 base available to decision-makers. In particular, we will examine how numerical estimates of  
6 the benefit of enhanced recovery on length of hospital stay have changed over time and how  
7 these might have been influenced by decisions taken by systematic reviewers as well as by  
8 the availability of new trials.  
9  
10  
11

## 12 13 **Methods**

### 14 15 *Literature searches*

16  
17  
18  
19  
20 This study was carried out following a rapid synthesis of evidence relating to enhanced  
21 recovery programmes in all types of surgery (Paton et al., in preparation). To identify  
22 systematic reviews, we searched the Cochrane Database of Systematic Reviews, the  
23 Database of Abstracts of Reviews of Effects (DARE) and Health Technology Assessment  
24 (HTA) Database from 1990 to March 2013. See Appendix 1 for search strategies. The  
25 PROSPERO database was searched to identify any ongoing systematic reviews. Systematic  
26 reviews evaluating enhanced recovery programmes in patients undergoing any type of  
27 elective surgery in a hospital setting in the UK NHS or a comparable healthcare system were  
28 eligible for inclusion in the rapid evidence synthesis. Review authors' definitions of enhanced  
29 recovery programmes were accepted. Outcomes of interest were any measure of clinical  
30 outcomes, patient experience or resource use. Reviews had to compare enhanced recovery  
31 with usual/standard care without a structured multimodal enhanced recovery pathway. For  
32 this methodological study, only systematic reviews of enhanced recovery programmes for  
33 colorectal surgery were considered.  
34  
35  
36  
37  
38  
39  
40  
41

### 42 43 *Study selection*

44  
45  
46 We stored the literature search results in a reference management database (EndNote X6).  
47 Two researchers independently screened all titles and abstracts obtained through the  
48 searches for potentially relevant articles. Full manuscripts of potentially relevant articles were  
49 ordered and two researchers independently assessed the relevance of each article using the  
50 criteria stated above. Disagreements between researchers were resolved by discussion or  
51 by recourse to a third researcher where necessary.  
52  
53  
54  
55  
56  
57  
58  
59  
60



### *Quality assessment*

Quality assessment of systematic reviews was based on the CRD critical appraisal processes for DARE (<http://www.crd.york.ac.uk/crdweb/HomePage.asp>). Specific aspects assessed were adequacy of the search; assessment of quality/risk of bias of included studies; quality assessment results taken into account in the analysis; study details reported and differences between studies accounted for; investigation of statistical heterogeneity; were gaps in research identified; and were the review conclusions justified. The quality assessment was performed by one researcher and checked by a second. Discrepancies were resolved by discussion or by recourse to a third researcher.

### *Data extraction and analysis*

Clinical effectiveness data for the rapid evidence synthesis were extracted into review software (EPPI Reviewer 4.0). An analysis plan for this methodological study was prepared in advance and additional methodological information was extracted into a Microsoft Excel spreadsheet. Data were extracted by one researcher and checked by another; discrepancies were resolved by consensus or where necessary by recourse to a third researcher.

Data extracted from the reviews included the systematic review inclusion criteria (particularly the definition of an ERAS programme); RCTs included (number and list); length of stay mean difference (MD) estimates and 95% confidence intervals (CIs) for each RCT as reported in the review; meta-analysis methods (e.g. type of model used); method used to handle missing means/SDs; definition of primary and total length of stay; pooled estimates of weighted MD (WMD) in length of stay between ERAS and control groups; and source of funding.

Extracted data were examined and tabulated to identify differences between reviews that may have influenced their conclusions and quantitative estimates of the effectiveness of enhanced recovery programmes compared with usual care. We focused on the outcome of length of primary hospital stay (and total length of stay including readmissions, where reported) because reduction of length of stay is a key objective of enhanced recovery programmes and because length of stay was a primary outcome of most included systematic reviews. Only length of stay data from randomised controlled trials (RCTs) were included in this analysis.

## Results

The report by Paton et al. included 11 systematic reviews of ERAS programmes for colorectal surgery. One review(4) focused on quality of life and patient satisfaction and another on compliance and variations in practice(5), leaving nine reviews that reported length of stay, of which seven reported a pooled effect estimate (weighted mean difference (WMD) in days). The review by Zhuang et al.,(6) which was published too late to be fully discussed by Paton et al., is also included in this report, giving a total of ten systematic reviews that met the inclusion criteria for this methodological study (Table 1).

Most of the included reviews were reasonably well conducted and reported (Table 2). The reviews by Wind et al., (7) Walter et al. (8), Spanjersberg et al. (9) and Zhuang et al. (6) met all seven quality criteria and were considered at low risk of bias. Three other reviews met six criteria but all failed to take study quality into account in their synthesis.(10-12) Adamina et al. (13) and Lv et al. (14) failed to meet two of the criteria, while the paper by Rawlinson et al. (15) only clearly met two criteria and was considered potentially at high risk of bias.

### *Chronological development of the evidence base*

Four systematic reviews were published in the years 2006–2009. At this stage only a few randomised trials were available. Wind et al. Wind 2006(7) included three trials; Eskicioglu et al. and Gouvas et al. four trials; and Walter et al. included just two trials (Table 1).

Four further reviews were published in 2010 and 2011. These all considered the same six trials, although one review chose to exclude two of these from its main analysis because the intervention did not meet the review definition of an ERAS programme. (9)

A systematic review by Lv et al. published in 2012 added one more trial, bringing the total to seven. However, just a year later Zhuang et al. published a systematic review with 13 included trials, among them four recent trials by Chinese investigators. With one exception,(16) the trials included in this review were identified and discussed by Paton et al. in our review of trials not included in the then-available systematic reviews.

The included reviews varied somewhat in the extent to which they cited previously published reviews of the field. However, in general reviews tended to cite most of the earlier reviews that would have been available at the time of writing. The first systematic review, by Wind et

1  
2  
3 al., was cited by eight of the nine subsequent reviews. Gouvas et al.'s review was cited by  
4 six of seven subsequent reviews and Varadhan et al. by four out of five (Table 3). The main  
5 exception was the paper by Rawlinson et al.,(15) which was not cited by three later reviews.  
6 Adamina et al. differed from other researchers in their use of Bayesian methodology and  
7 their work was only cited by one of the four later reviews. Zhuang et al. cited all the previous  
8 systematic reviews except that of Lv et al., which may have been published too late to be  
9 included.  
10  
11  
12

### 13 14 15 *Methodological differences between systematic reviews*

16  
17  
18 The four early systematic reviews of ERAS for colorectal surgery showed a number of  
19 methodological differences. Although inclusion criteria appeared similar, Walter et al.  
20 excluded two trials that were included in the reviews by Eskicioglu et al. and Gouvas et al. In  
21 one case(17) this was reported to be because the trial included some patients who had  
22 undergone small bowel surgery; the reason for the other exclusion(18) was not reported.  
23 Walter et al. also differed from the other reviews in its definition of outcomes: length of stay  
24 was measured as total days of admission in this review and as days spent in hospital after  
25 surgery in the other reviews published in the same period.  
26  
27  
28  
29  
30

31  
32 In terms of data synthesis, Eskicioglu et al. was the only one of the four early reviews that  
33 did not perform a meta-analysis, on the grounds that data in the right form (means and  
34 standard deviations) were not available. The remaining three reviews elected to pool.  
35 Gouvas et al. and Wind et al. used random-effects models for their main meta-analysis,  
36 while Walter et al. used a fixed-effect model. Both Wind et al. and Walter et al. justified their  
37 choice on the basis of a random-effects model being more appropriate in the presence of  
38 some heterogeneity but neither stated a level of heterogeneity above which a random-effects  
39 model should be used. Wind et al. stated that trials without means and standard deviations  
40 were omitted from the analysis, while Gouvas et al. estimated from reported medians and  
41 ranges where necessary. Walter et al. did not report on this point.  
42  
43  
44  
45  
46  
47

48  
49 Pooled estimates (WMD) of the effect of ERAS on primary length of stay varied substantially,  
50 being considerably higher and with a wider confidence interval in Walter et al. compared with  
51 the other reviews (Figure 1 and Table 4). Wind et al. and Gouvas et al. provided almost  
52 identical WMDs, the only effect of an additional trial in Gouvas et al. being to slightly narrow  
53 the 95% confidence interval. Walter et al. reported no statistical heterogeneity while the  
54 other two reviews found some evidence of heterogeneity.  
55  
56  
57  
58  
59  
60

1  
2  
3 Overall, these reviews suggested considerable uncertainty about the magnitude of the effect  
4 of ERAS programmes in reducing length of hospital stay. Based on 95% confidence  
5 intervals, the effect could plausibly range from less than 0.5 days to almost 5 days.  
6  
7

8  
9 The next group of systematic reviews to be published(9, 12, 13, 15) included up to six RCTs  
10 (additional RCTs by Muller et al. (19) and Serclova et al. (20) were now available).  
11 Spanjersberg et al. differed from other authors in treating length of stay as a secondary  
12 outcome of the review and more significantly by excluding two trials that were included in  
13 most other systematic reviews. The authors stated that Muller et al. and Delaney et al. (17)  
14 failed to meet the inclusion criterion of including at least seven elements in the ERAS  
15 intervention.  
16  
17  
18  
19

20  
21 None of these reviews provided clear definitions of outcomes but Varadhan et al. and  
22 Spanjersberg et al. appeared to measure days in hospital after surgery (i.e., primary length  
23 of stay). Adamina et al. reported their outcome as length of hospital stay without definition or  
24 distinguishing between primary and total length of stay. The reviews also differed in their  
25 reported treatment of studies with missing data (mean/standard deviation): Varadhan et al.  
26 obtained data from original authors, Spanjersberg et al. calculated from median and range  
27 and Adamina et al. did not report their methods. Adamina et al. were the only authors who  
28 used Bayesian methods for meta-analysis, although few details were reported. (13)  
29 Rawlinson et al. (15) did not report an original meta-analysis but instead discussed the  
30 findings of Gouvas et al. and Varadhan et al.  
31  
32  
33  
34  
35  
36  
37

38 Compared with the earlier reviews, this group of systematic reviews reported a substantially  
39 narrower range of effect estimates, all suggesting a reduction of 2.5 to 3 days in primary  
40 hospital stay associated with ERAS programmes (Table 1). The range of 95% confidence  
41 intervals was also narrower (approximately 1.1 to 3.9 days).  
42  
43  
44

45  
46 The 2012 review by Lv et al. added one additional RCT for a total of seven trials. (14) The  
47 new trial(21) compared ERAS with traditional care in patients undergoing both laparoscopic  
48 and open surgery and so was treated as two trials in the meta-analysis. The trial showed a 1  
49 day reduction in length of stay in the laparoscopic setting but there was no difference in  
50 patients undergoing open surgery. Lv et al. also differed from most of the earlier reviews in  
51 defining length of stay as length of the index admission (rather than days in hospital after  
52 surgery). It is unclear whether this explains the discrepancy but Lv et al. reported a smaller  
53 reduction in length of stay compared with the reviews immediately preceding it (-1.88 days,  
54  
55  
56  
57  
58  
59  
60

1  
2  
3 95% CI -2.91 to -0.86). However, this estimate was still compatible with a 'true' reduction of  
4 around 2 to 3 days in primary length of stay.  
5  
6

7  
8 The most recent systematic review that we are aware of was published in May 2013, too late  
9 to be considered in detail in the full report.(6) It is more comprehensive than the previous  
10 reviews, with 13 included trials (two with both open and laparoscopic arms) and 1910  
11 participants. All except one(22) of the RCTs included in our report were also in this  
12 systematic review. However, Zhuang et al. also included one trial that we excluded.(16) In  
13 fact this publication is a single-centre report of results from the LAFA trial that was reported  
14 in full by Vlug et al.(21) so it is likely that there was double-counting of these patients in  
15 Zhuang et al.'s meta-analyses. However, this publication was not included in the meta-  
16 analysis of length of stay outcomes.  
17  
18  
19  
20  
21

22  
23 Some of the trials included for the first time in Zhuang et al.'s review, particularly that of  
24 Ionescu et al. (2009), were available to earlier systematic reviewers. Of the reviews  
25 published in 2010 or later, Varadhan et al. did not give references for any excluded studies.  
26 Adamina et al. gave references for excluded studies but did not list Ionescu et al.,  
27 suggesting that their search did not locate this trial. Rawlinson et al. did not list excluded  
28 studies, while the Cochrane review by Spanjersberg et al. did not list Ionescu et al. among  
29 the excluded studies. Lv et al. excluded 26 out of 33 studies examined in full text but did not  
30 report any details.  
31  
32  
33  
34  
35

36  
37 There was a discrepancy between Zhuang et al. and Lv et al. in their data extraction of the  
38 trial by Vlug et al. There were also minor data extraction discrepancies between these  
39 reviews for two other trials but as they were in opposite directions in the two cases this is  
40 unlikely to have had a major impact on the overall meta-analysis results.  
41  
42  
43

44  
45 Like most included reviews, Zhuang et al. defined length of stay as time in hospital after  
46 surgery. The pooled estimate of a 2.44 day reduction in primary length of stay (95% CI 1.83  
47 to 3.06) for ERAS relative to traditional care was very similar to those reported by Varadhan  
48 et al. (12) and Adamina et al. (13)  
49  
50  
51  
52  
53  
54  
55  
56  
57  
58  
59  
60

## Discussion

### *Main findings*

Systematic reviews of randomised trials have consistently shown a reduction in length of hospital stay with ERAS compared with traditional care. The estimated effect tended to increase over time from 2006 to 2010 as more trials were published but has not altered significantly in the most recent review, despite the inclusion of several unique trials. The best estimate appears to be an average reduction of around 2.5 days in primary post-operative length of hospital stay. However, there is considerable heterogeneity in most pooled estimates and the complexity of ERAS as an intervention means that the benefits achieved in routine practice may differ from those reported in clinical trials. These issues are discussed in the full project report (Paton et al., in preparation).

The published systematic reviews show a high level of redundancy, with multiple reviews covering identical or very similar groups of trials. Differences in pooled effect estimates across reviews reflect differences in interpretation of inclusion criteria, searching and analytical methods or software. A few data extraction discrepancies were observed but these are unlikely to have significantly affected review conclusions.

### *Findings in relation to previous studies*

The existence of multiple systematic reviews covering the same topic was investigated by Siontis et al.(23) They found that of 73 systematic reviews (with meta-analysis) published in 2010, 49 (67%) had at least one other published meta-analysis on the same topic. A particularly striking example was the existence of 11 meta-analyses of statins to prevent atrial fibrillation after cardiac surgery; all except the first of these showed a large positive effect of the intervention. Our findings reinforce those of Siontis et al., although even where reviews included exactly the same trials their pooled estimates of effect were not necessarily identical. Enhanced recovery differs from an intervention like statins after cardiac surgery, being more complex and changing over time as more elements are incorporated into routine practice. This would tend to favour increased variation between reviews along the lines we observed.

A slightly different approach to investigating overlap between systematic reviews was taken by Woodman et al., who looked at the differences between eight reviews of community interventions to promote physical activity.(24) Across the eight reviews there were 28

1  
2  
3 included studies, of which 22 (79%) were only included in one review. There was little cross-  
4 citation between reviews. For most reviews, Woodman et al. could explain why primary data  
5 were not included, which was usually due to the reviews having a relatively narrow scope.  
6 Despite these issues, the review conclusions were similar. Comparing our results with those  
7 of Woodman et al., the enhanced recovery reviews had a higher degree of overlap although  
8 they differed with respect to inclusion of non-randomised studies (not discussed in this  
9 paper). The differences between the enhanced recovery and physical activity reviews  
10 probably reflect the fact that enhanced recovery, although a complex intervention, is more  
11 narrowly defined than interventions to increase physical activity  
12  
13  
14  
15  
16

### 17 18 *Implications* 19

20  
21 The findings of this study have implications for systematic reviewers, readers of systematic  
22 reviews and producers of systematic review-based evidence products. Systematic reviewers  
23 can help readers compare their reviews with other similar studies by clear reporting of key  
24 decisions, especially on inclusion/exclusion and on statistical pooling. Most of the reviews of  
25 enhanced recovery programmes performed a meta-analysis to calculate a WMD in length of  
26 stay between enhanced recovery and usual care groups. Calculating the WMD requires the  
27 means and standard deviations (SDs) of length of stay in each group in the included trials,  
28 but trials often report a different measure such as median and range (or interquartile range).  
29 Systematic reviews can deal with this situation in different ways, for example by using  
30 formulae to estimate the mean and SD, contacting the trial authors or omitting trials from any  
31 meta-analysis if mean and SD are not reported. The enhanced recovery reviews adopted all  
32 of these approaches but did not report which data were estimated rather than derived  
33 directly from trial reports. Improved reporting in this area would improve transparency and  
34 help readers to understand discrepancies between apparently similar meta-analyses. Length  
35 of stay outcomes were not always clearly defined or reported and differences between  
36 reviews may in part stem from the fact that they were measuring an outcome in different  
37 ways.  
38  
39  
40  
41  
42  
43  
44  
45  
46  
47

48  
49 Readers of systematic reviews need to be aware of the existence of multiple systematic  
50 reviews for a high percentage of topics. This means they should not rely uncritically on the  
51 first review they find and underlines the importance of services that critically appraise  
52 systematic reviews and those that provide overviews of reviews across a topic area.<sup>(25, 26)</sup>  
53 As an aid to transparency, authors of new systematic reviews should also acknowledge the  
54 existence of any systematic reviews addressing the same or a similar question.  
55  
56  
57  
58  
59  
60



1  
2  
3 The use of systematic reviews to produce rapid evidence summaries to inform decision-  
4 making is an area where methodology is still developing, although some methodological  
5 frameworks have been published.(27, 28) Assessment of the quality and reliability of  
6 systematic reviews is an important part of this process but the present study suggests that  
7 conventional approaches to critical appraisal are not sufficient and careful attention should  
8 be paid to apparently minor differences between reviews. This may require increased  
9 extraction of methodological data even though the results may not be included in published  
10 evidence summaries aimed at decision-makers.  
11  
12  
13  
14

### 15 16 17 *Strengths and limitations*

18  
19  
20 The strength of this study is that we have looked in some detail at reviews of a complex  
21 clinical intervention to identify differences between them and possible explanations, such as  
22 differences in intervention and outcome definitions and handling of missing data from  
23 included trials in meta-analyses. We have identified limitations in reporting as one of the  
24 main barriers to understanding differences between reviews of the same topic. These  
25 reporting issues have often limited our ability to comment on whether decisions taken by  
26 review authors appear to be 'right' or 'wrong'. The discrepancies between reviews identified  
27 in this study sometimes arose from decisions where both options could be considered  
28 reasonable, for example whether or not to exclude the trial by Delaney et al.(17) because a  
29 small number of patients undergoing small bowel surgery were included.  
30  
31  
32  
33  
34

35  
36  
37 This study only considered length of stay outcomes. Length of stay was selected as the  
38 primary outcome because of its importance for the health service at a time of acute financial  
39 pressure and because it was an outcome considered in all the included systematic reviews.  
40 Other important outcomes, including morbidity and mortality, are discussed in the full report  
41 (Paton et al., in preparation).  
42  
43  
44

### 45 46 47 *Unanswered questions/further research*

48  
49 The current study suggests a need for further, more in-depth research into methods of  
50 quality assessment of systematic reviews; to make the best use of a cumulative evidence  
51 base for decision-making; and to identify methodological issues and decision points that may  
52 influence the eventual conclusions of a review. These issues are particularly important for  
53 researchers seeking to help decision-makers interpret and use systematic reviews.  
54  
55 Enhanced recovery is a complex intervention with multiple components and its successful  
56 implementation is likely to be influenced by numerous background factors. Given this  
57  
58  
59  
60

1  
2  
3 background, researchers and clinicians carrying out new systematic reviews should ensure  
4 that their chosen method of synthesis is appropriate for exploring intervention complexity.  
5  
6 The recently published research agenda for reviews of complex interventions(29) provides  
7 timely guidance in this regard. Ideally, systematic reviews of emerging complex interventions  
8 (for example, interventions to support integration of health and social care) should use  
9 standardised methods and outcome definitions and be regularly updated, although this may  
10 be difficult to achieve in practice.  
11  
12  
13

14  
15 Systematic reviews of enhanced recovery programmes in colorectal surgery continue to be  
16 published and we are aware of at least two publications since our search was  
17 completed.(30, 31) The authors of one of these reviews refer to their paper as ‘a substantial  
18 update from previous meta-analyses’(30) but in fact the included trials and overall findings  
19 are almost identical to those of Zhuang et al.(6) This is not the fault of the authors but  
20 represents an avoidable waste of research resources. Systematic reviews are now  
21 increasingly being registered prospectively at the outset on databases such as  
22 PROSPERO(32) and it will be interesting to see whether the production of overlapping  
23 reviews decreases over time.  
24  
25  
26  
27  
28  
29

30 **Word count (main text): 3973**  
31  
32  
33  
34  
35  
36  
37  
38  
39  
40  
41  
42  
43  
44  
45  
46  
47  
48  
49  
50  
51  
52  
53  
54  
55  
56  
57  
58  
59  
60

1  
2  
3 **Contributors:** All authors contributed to the design of this methodological study and  
4 commented on the analysis plan and/or draft manuscript. PW took overall responsibility for  
5 the rapid evidence synthesis and is guarantor. D Chambers and FP extracted additional  
6 methodological data. D Chambers wrote the first draft of the paper. All authors have seen  
7 and approved the final version.  
8  
9

10  
11 **Competing interests:** All authors have completed the ICMJE uniform disclosure form at  
12 [www.icmje.org/coi\\_disclosure.pdf](http://www.icmje.org/coi_disclosure.pdf) and declare: no support from any organisation for the  
13 submitted work; no financial relationships with any organisations that might have an interest  
14 in the submitted work in the previous three years; no other relationships or activities that  
15 could appear to have influenced the submitted work.  
16  
17  
18

19  
20 **Transparency declaration:** The lead author (the manuscript's guarantor) affirms that this  
21 manuscript is an honest, accurate, and transparent account of the study being reported; that  
22 no important aspects of the study have been omitted; and that any discrepancies from the  
23 study as planned (and, if relevant, registered) have been explained.  
24  
25  
26  
27  
28  
29  
30  
31  
32  
33  
34  
35  
36  
37  
38  
39  
40  
41  
42  
43  
44  
45  
46  
47  
48  
49  
50  
51  
52  
53  
54  
55  
56  
57  
58  
59  
60

## References

1. Enhanced Recovery Partnership Programme. Delivering enhanced recovery – Helping patients to get better sooner after surgery. London: Department of Health, 2010 March 31st.
2. Kehlet H, Wilmore DW. Multimodal strategies to improve surgical outcome. *Am J Surg.* 2002 Jun;183(6):630-41.
3. Sturm L, Cameron AL. Brief review: Fast-track surgery and enhanced recovery after surgery (ERAS) programs. Melbourne: Australian Safety and Efficacy Register of New Interventional Procedures - Surgical (ASERNIP-S), 2009 Contract No.: 3.
4. Khan S, Wilson T, Ahmed J, Owais A, MacFie J. Quality of life and patient satisfaction with enhanced recovery protocols. *Colorectal Dis.* 2010;12(12):1175-82.
5. Ahmed J, Khan S, Lim M, Chandrasekaran TV, MacFie J. Enhanced recovery after surgery protocols - compliance and variations in practice during routine colorectal surgery. *Colorectal Dis.* 2012;14(9):1045-51.
6. Cheng-Le Z, Xing-Zhao YX-D, Z., Bi-Cheng C, Zhen Y. Enhanced recovery after surgery programs versus traditional care for colorectal surgery: A meta-analysis of randomized controlled trials. *Dis Colon Rectum.* 2013;56:667-78.
7. Wind J, Polle SW, Fung Kon Jin PH, Dejong CH, Meyenfeldt MF, Ubbink DT, et al. Systematic review of enhanced recovery programmes in colonic surgery. *Br J Surg.* 2006;93(7):800-9.
8. Walter CJ, Collin J, Dumville JC, Drew PJ, Monson JR. Enhanced recovery in colorectal resections: a systematic review and meta-analysis. *Colorectal Dis.* 2009 May;11(4):344-53.
9. Spanjersberg Willem R, Reurings J, Keus F, van Laarhoven Cornelis JHM. Fast track surgery versus conventional recovery strategies for colorectal surgery. *Cochrane Database of Systematic Reviews.* 2011 (2).
10. Eskicioglu C, Forbes SS, Aarts M-A, Okrainec A, McLeod RS. Enhanced Recovery after Surgery (ERAS) programs for patients having colorectal surgery: a meta-analysis of randomized trials. *J Gastrointest Surg.* 2009 Dec;13(12):2321-9.
11. Gouvas N, Tan E, Windsor A, Xynos E, Tekkis PP. Fast-track vs standard care in colorectal surgery: a meta-analysis update. *Int J Colorectal Dis.* 2009 Oct;24(10):1119-31.
12. Varadhan KK, Neal KR, Dejong CH, Fearon KC, Ljungqvist O, Lobo DN. The enhanced recovery after surgery (ERAS) pathway for patients undergoing major elective open colorectal surgery: a meta-analysis of randomized controlled trials. *Clin Nutr.* 2010;29(4):434-40.
13. Adamina M, Kehlet H, Tomlinson GA, Senagore AJ, Delaney CP. Enhanced recovery pathways optimize health outcomes and resource utilization: a meta-analysis of randomized controlled trials in colorectal surgery. *Surgery.* 2011;149(6):830-40.
14. Lv L, Shao Y-f, Zhou Y-b. The enhanced recovery after surgery (ERAS) pathway for patients undergoing colorectal surgery: an update of meta-analysis of randomized controlled trials. *Int J Colorectal Dis.* 2012;27:1549–54.
15. Rawlinson A, Kang P, Evans J, Khanna A. A systematic review of enhanced recovery protocols in colorectal surgery. *Ann R Coll Surg Engl.* 2011;93(8):583-8.
16. van Bree SH, Vlug MS, Bemelman WA, Hollmann MW, Ubbink DT, Zwinderman AH, et al. Faster recovery of gastrointestinal transit after laparoscopy and fast-track care in patients undergoing colonic surgery. *Gastroenterology.* 2011 Sep;141(3):872-80.e1-4.
17. Delaney CP, Zutshi M, Senagore AJ, Remzi FH, Hammel J, Fazio VW. Prospective, randomized, controlled trial between a pathway of controlled rehabilitation with early ambulation and diet and traditional postoperative care after laparotomy and intestinal resection. *Dis Colon Rectum.* 2003 Jul;46(7):851-9.
18. Khoo CK, Vickery CJ, Forsyth N, Vinall NS, Eyre-Brook IA. A prospective randomized controlled trial of multimodal perioperative management protocol in patients undergoing elective colorectal resection for cancer. *Ann Surg.* 2007 Jun;245(6):867-72.

19. Muller S, Zalunardo MP, Hubner M, Clavien PA, Demartines N, Zurich Fast Track Study G. A fast-track program reduces complications and length of hospital stay after open colonic surgery. *Gastroenterology*. 2009 Mar;136(3):842-7.
20. Serclova Z, Dytrych P, Marvan J, Nova K, Hankeova Z, Ryska O, et al. Fast-track in open intestinal surgery: prospective randomized study (Clinical Trials Gov Identifier no. NCT00123456). *Clin Nutr*. 2009 Dec;28(6):618-24.
21. Vlug MS, Wind J, Hollmann MW, Ubbink DT, Cense HA, Engel AF, et al. Laparoscopy in combination with fast track multimodal management is the best perioperative strategy in patients undergoing colonic surgery: a randomized clinical trial (LAFA-study). *Ann Surg*. 2011 Dec;254(6):868-75.
22. Lee TG, Kang SB, Kim DW, Hong S, Heo SC, Park KJ. Comparison of early mobilization and diet rehabilitation program with conventional care after laparoscopic colon surgery: a prospective randomized controlled trial. *Dis Colon Rectum*. 2011 Jan;54(1):21-8.
23. Siontis KC, Hernandez-Boussard T, Ioannidis JP. Overlapping meta-analyses on the same topic: survey of published studies. *BMJ*. 2013;347:f4501.
24. Woodman J, Thomas J, Dickson K. How explicable are differences between reviews that appear to address a similar research question? A review of reviews of physical activity interventions. *Systematic reviews*. 2012;1:37.
25. Chambers D, Wilson P, Thompson C, Hanbury A, Farley K, Light K. Maximizing the impact of systematic reviews in healthcare decision-making: a systematic scoping review of knowledge translation resources. *Milbank Q*. 2011;89(1):131-56.
26. Lavis JN. How can we support the use of systematic reviews in policymaking? *PLoS Medicine*. 2009;6(11):e1000141.
27. Chambers D, Wilson P. A framework for production of systematic review based briefings to support evidence-informed decision-making. *Systematic reviews*. 2012;1:32.
28. Khangura S, Konnyu K, Cushman R, Grimshaw J, Moher D. Evidence summaries: the evolution of a rapid review approach. *Systematic reviews*. 2012;1:10.
29. Noyes J, Gough D, Lewin S, Mayhew A, Michie S, Pantoja T, et al. A research and development agenda for systematic reviews that ask complex questions about complex interventions. *J Clin Epidemiol*. 2013 Nov;66(11):1262-70.
30. Greco M, Capretti G, Beretta L, Gemma M, Pecorelli N, Braga M. Enhanced Recovery Program in Colorectal Surgery: A Meta-analysis of Randomized Controlled Trials. *World J Surg*. 2013 Dec 25.
31. Gianotti L, Beretta S, Luperto M, Bernasconi D, Valsecchi MG, Braga M. Enhanced recovery strategies in colorectal surgery: is the compliance with the whole program required to achieve the target? *Int J Colorectal Dis*. 2013 Dec 13.
32. Booth A, Clarke M, Dooley G, Gherzi D, Moher D, Petticrew M, et al. PROSPERO at one year: an evaluation of its utility. *Systematic reviews*. 2013;2:4.
33. Anderson AD, McNaught CE, MacFie J, Tring I, Barker P, Mitchell CJ. Randomized clinical trial of multimodal optimization and standard perioperative surgical care. *Br J Surg*. 2003 Dec;90(12):1497-504.
34. Gatt M, Anderson AD, Reddy BS, Hayward-Sampson P, Tring IC, MacFie J. Randomized clinical trial of multimodal optimization of surgical care in patients undergoing major colonic resection. *Br J Surg*. 2005 Nov;92(11):1354-62.
35. Ionescu D, Iancu C, Ion D, Al-Hajjar N, Margarit S, Mocan L, et al. Implementing fast-track protocol for colorectal surgery: a prospective randomized clinical trial. *World J Surg*. 2009 Nov;33(11):2433-8.
36. Garcia-Botello S, Canovas de Lucas R, Tornero C, Escamilla B, Espi-Macias A, Esclapez-Valero P, et al. Implementation of a perioperative multimodal rehabilitation protocol in elective colorectal surgery. A prospective randomised controlled study. *Cir Esp*. 2011 Mar;89(3):159-66.
37. Ren L, Zhu D, Wei Y, Pan X, Liang L, Xu J, et al. Enhanced Recovery After Surgery (ERAS) program attenuates stress and accelerates recovery in patients after radical resection for colorectal cancer: a prospective randomized controlled trial. *World J Surg*. 2012 Feb;36(2):407-14.

- 1  
2  
3 38. Wang G, Jiang Z, Zhao K, Li G, Liu F, Pan H, et al. Immunologic response after  
4 laparoscopic colon cancer operation within an enhanced recovery program. *J Gastrointest*  
5 *Surg.* 2012 Jul;16(7):1379-88.  
6 39. Wang Q, Suo J, Jiang J, Wang C, Zhao YQ, Cao X. Effectiveness of fast-track  
7 rehabilitation vs conventional care in laparoscopic colorectal resection for elderly patients: a  
8 randomized trial. *Colorectal Dis.* 2012 Aug;14(8):1009-13.  
9 40. Yang D, He W, Zhang S, Chen H, Zhang C, He Y. Fast-track surgery improves  
10 postoperative clinical recovery and immunity after elective surgery for colorectal carcinoma:  
11 randomized controlled clinical trial. *World J Surg.* 2012 Aug;36(8):1874-80.  
12  
13  
14  
15  
16  
17  
18  
19  
20  
21  
22  
23  
24  
25  
26  
27  
28  
29  
30  
31  
32  
33  
34  
35  
36  
37  
38  
39  
40  
41  
42  
43  
44  
45  
46  
47  
48  
49  
50  
51  
52  
53  
54  
55  
56  
57  
58  
59  
60

For peer review only

Table 1: Overview of systematic reviews of ERAS for colorectal surgery

| Review               | Minimum definition of ERAS intervention                          | Search cut-off date     | Included RCTs                                                                                                                                                                                                              |
|----------------------|------------------------------------------------------------------|-------------------------|----------------------------------------------------------------------------------------------------------------------------------------------------------------------------------------------------------------------------|
| Wind 2006(7)         | At least four elements required                                  | December 2005           | Anderson 2003(33); Delaney 2003(17); Gatt 2005(34)                                                                                                                                                                         |
| Eskicioglu 2009(10)  | Not stated                                                       | May 2008                | Anderson 2003(33); Delaney 2003(17); Gatt 2005(34); Khoo 2007(18)                                                                                                                                                          |
| Gouvas 2009(11)      | At least four elements required                                  | July 2008               | Anderson 2003(33); Delaney 2003(17); Gatt 2005(34); Khoo 2007(18)                                                                                                                                                          |
| Walter 2009(8)       | At least five elements required (pre-, peri- and post-operative) | January 2007            | Anderson 2003(33); Gatt 2005(34)                                                                                                                                                                                           |
| Varadhan 2010(12)    | At least four elements required (pre-, peri- and post-operative) | November 2009           | Anderson 2003(33); Delaney 2003(17); Gatt 2005(34); Khoo 2007(18); Muller 2009(19); Serclova 2009(20)                                                                                                                      |
| Adamina 2011(13)     | Documented compliance with at least four of five key elements    | June 2010               | Anderson 2003(33); Delaney 2003(17); Gatt 2005(34); Khoo 2007(18); Muller 2009(19); Serclova 2009(20)                                                                                                                      |
| Rawlinson 2011(15)   | At least four elements required (pre-, peri- and post-operative) | February 2011           | Anderson 2003(33); Delaney 2003(17); Gatt 2005(34); Khoo 2007(18); Muller 2009(19); Serclova 2009(20)                                                                                                                      |
| Spanjersberg 2011(9) | At least seven elements required                                 | Unclear (January 2011?) | Anderson 2003(33); Gatt 2005(34); Khoo 2007(18); Serclova 2009(20)                                                                                                                                                         |
| Lv 2012(14)          | Not stated                                                       | April 2012              | Anderson 2003(33); Delaney 2003(17); Gatt 2005(34); Khoo 2007(18); Muller 2009(19); Serclova 2009(20); Vlug 2011(21)                                                                                                       |
| Zhuang 2013.(6)      | At least seven elements required                                 | July 2012               | Anderson 2003(33); Gatt 2005(34); Khoo 2007(18); Muller 2009(19); Serclova 2009(20); Ionescu 2009(35); Vlug 2011(21) Garcia-Botello 2011(36); Bree 2011(16); Ren 2012(37); G Wang 2012(38); Q Wang 2012(39); Yang 2012(40) |



Table 2: Risk of bias in included systematic reviews

| Review               | Adequate search | Risk of bias assessed | Quality score accounted for in analysis | Study details reported and differences accounted for | Statistical heterogeneity investigated | Gaps in research identified | Conclusions justified |
|----------------------|-----------------|-----------------------|-----------------------------------------|------------------------------------------------------|----------------------------------------|-----------------------------|-----------------------|
| Wind 2006(7)         | ✓               | ✓                     | ✓                                       | ✓                                                    | ✓                                      | ✓                           | ✓                     |
| Eskicioglu 2009(10)  | ✓               | ✓                     | x                                       | ✓                                                    | ✓                                      | ✓                           | ✓                     |
| Gouvas 2009(11)      | ✓               | ✓                     | x                                       | ✓                                                    | ✓                                      | ✓                           | ✓                     |
| Walter 2009(8)       | ✓               | ✓                     | ✓                                       | ✓                                                    | ✓                                      | ✓                           | ✓                     |
| Varadhan 2010(12)    | ✓               | ✓                     | x                                       | ✓                                                    | ✓                                      | ✓                           | ✓                     |
| Adamina 2011(13)     | ✓               | ✓                     | UC                                      | ✓                                                    | UC                                     | ✓                           | ✓                     |
| Rawlinson 2011(15)   | ✓               | x                     | x                                       | ✓                                                    | UC                                     | x                           | UC                    |
| Spanjersberg 2011(9) | ✓               | ✓                     | ✓                                       | ✓                                                    | ✓                                      | ✓                           | ✓                     |
| Lv 2012(14)          | ✓               | ✓                     | x                                       | x                                                    | ✓                                      | ✓                           | ✓                     |
| Zhuang 2013.(6)      | ✓               | ✓                     | ✓                                       | ✓                                                    | ✓                                      | ✓                           | ✓                     |

UC, unclear

1  
2  
3  
4  
5  
6  
7  
8  
9  
10  
11  
12  
13  
14  
15  
16  
17  
18  
19  
20  
21  
22  
23  
24  
25  
26  
27  
28  
29  
30  
31  
32  
33  
34  
35  
36  
37  
38  
39  
40  
41  
42  
43  
44  
45  
46  
47  
48  
49

Table 3: Cross-citation among included systematic reviews

| Review               | Reviews cited                                                                                                                 | Cited by subsequent reviews                                                                                                                          |
|----------------------|-------------------------------------------------------------------------------------------------------------------------------|------------------------------------------------------------------------------------------------------------------------------------------------------|
| Wind 2006(7)         | NA                                                                                                                            | Eskicioglu 2009(10); Gouvas 2009(11); Walter 2009(8); Varadhan 2010(12); Adamina 2011(13); Rawlinson 2011(15); Spanjersberg 2011(9); Zhuang 2013.(6) |
| Eskicioglu 2009(10)  | Wind 2006(7)                                                                                                                  | Varadhan 2010(12); Rawlinson 2011(15); Zhuang 2013.(6)                                                                                               |
| Gouvas 2009(11)      | Wind 2006(7)                                                                                                                  | Varadhan 2010(12); Adamina 2011(13); Rawlinson 2011(15); Spanjersberg 2011(9); Lv 2012(14); Zhuang 2013.(6)                                          |
| Walter 2009(8)       | Wind 2006(7)                                                                                                                  | Varadhan 2010(12); Spanjersberg 2011(9); Lv 2012(14); Zhuang 2013.(6)                                                                                |
| Varadhan 2010(12)    | Wind 2006(7); Eskicioglu 2009(10); Gouvas 2009(11); Walter 2009(8)                                                            | Rawlinson 2011(15); Spanjersberg 2011(9); Lv 2012(14); Zhuang 2013.(6)                                                                               |
| Adamina 2011(13)     | Wind 2006(7); Gouvas 2009(11)                                                                                                 | Zhuang 2013.(6)                                                                                                                                      |
| Rawlinson 2011(15)   | Wind 2006(7); Eskicioglu 2009(10); Gouvas 2009(11); Varadhan 2010(12)                                                         | Not cited                                                                                                                                            |
| Spanjersberg 2011(9) | Wind 2006(7); Gouvas 2009(11); Walter 2009(8); Varadhan 2010(12)                                                              | Lv 2012(14); Zhuang 2013.(6)                                                                                                                         |
| Lv 2012(14)          | Gouvas 2009(11); Walter 2009(8); Varadhan 2010(12); Spanjersberg 2011(9)                                                      | Not cited                                                                                                                                            |
| Zhuang 2013.(6)      | Wind 2006(7); Eskicioglu 2009(10); Gouvas 2009(11); Walter 2009(8); Varadhan 2010(12); Adamina 2011(13); Spanjersberg 2011(9) | NA                                                                                                                                                   |

NA, not applicable

Table 4: Summary of meta-analyses for length of stay

| Review               | Definition of primary length of stay                                    | Meta-analysis model | Pooled effect estimate for primary length of stay                                     | Pooled effect estimate for total length of stay |
|----------------------|-------------------------------------------------------------------------|---------------------|---------------------------------------------------------------------------------------|-------------------------------------------------|
| Wind 2006(7)         | Days in hospital after surgery                                          | Random              | WMD -1.89 (-3.61 to -0.18) $I^2 = 63.4\%$                                             | Not calculated                                  |
| Eskicioglu 2009(10)  | Days in hospital after surgery                                          | NA                  | Not calculated (authors stated pooling was not feasible)                              |                                                 |
| Gouvas 2009(11)      | Days in hospital after surgery                                          | Random              | WMD -1.88 (-3.35 to -0.41) $I^2 = 45\%$                                               | WMD -1.73 (-3.50 to 0.04) $I^2 = 0\%$           |
| Walter 2009(8)       | Days in hospital during index admission                                 | Fixed               | WMD -3.64 (-4.98 to -2.29) $I^2 = 0\%$                                                | WMD -3.75 (-5.11 to -2.40) $I^2 = 0\%$          |
| Varadhan 2010(12)    | Not explicitly defined but appears to be days in hospital after surgery | Random              | WMD -2.51 (-3.54 to -1.47) $I^2 = 55\%$                                               | Not calculated                                  |
| Adamina 2011(13)     | Length of stay outcome not explicitly defined                           | Bayesian            | Mean difference for 'length of stay' -2.5 (95% CrI -3.92 to -1.11) $I^2$ not reported |                                                 |
| Rawlinson 2011(15)   | Not defined                                                             | NA                  | Not calculated (authors cited findings from Gouvas and Varadhan)                      |                                                 |
| Spanjersberg 2011(9) | Not explicitly defined but appears to be days in hospital after surgery | Fixed               | WMD -2.94 (-3.69 to -2.19) $I^2 = 0\%$                                                | Not calculated                                  |
| Lv 2012(14)          | Days in hospital during index admission                                 | Random              | WMD -1.88 (-2.91 to -0.86) $I^2 = 75\%$                                               | Not calculated                                  |
| Zhuang 2013.(6)      | Days in hospital after surgery                                          | Random              | WMD -2.44 (-3.06 to -1.83) $I^2 = 88\%$                                               | WMD -2.39 (-3.70 to -1.09) $I^2 = 85\%$         |

NA, not applicable

1  
2  
3  
4  
5  
6  
7  
8  
9  
10  
11  
12  
13  
14  
15  
16  
17  
18  
19  
20  
21  
22  
23  
24  
25  
26  
27  
28  
29  
30  
31  
32  
33  
34  
35  
36  
37  
38  
39  
40  
41  
42  
43  
44  
45  
46  
47  
48  
49

| Figure 1: Summary of pooled results for primary length of stay

For peer review only

## Appendix 1: Search strategy for systematic reviews

- #1 ERAS:ti,ab  
#2 ((enhanced or early or accelerated or fast track or fast-track or rapid) near/1 (recover\* or rehabilitat\* or convalesc\* or mobil\* or ambulat\* or walk\* or feed\* or nutrition\* or eat\*) near/3 (surger\* or program\* or protocol\* or pathway\*)):ti,ab  
#3 ((multimodal or optimised or optimized) near/1 (recover\* or rehabilitat\* or convalesc\*)):ti,ab  
#4 #1 or #2 or #3  
#5 MeSH descriptor: [Receptors, Endothelin] explode all trees  
#6 #4 not #5

## Appendix 1: Search strategy for systematic reviews

#1 ERAS:ti,ab

#2 ((enhanced or early or accelerated or fast track or fast-track or rapid) near/1 (recover\* or rehabilitat\* or convalesc\* or mobil\* or ambulat\* or walk\* or feed\* or nutrition\* or eat\*) near/3 (surger\* or program\* or protocol\* or pathway\*)):ti,ab

#3 ((multimodal or optimised or optimized) near/1 (recover\* or rehabilitat\* or convalesc\*)):ti,ab

#4 #1 or #2 or #3

#5 MeSH descriptor: [Receptors, Endothelin] explode all trees

#6 #4 not #5

1  
2  
3  
4  
5  
6  
7  
8  
9  
10  
11  
12  
13  
14  
15  
16  
17  
18  
19  
20  
21  
22  
23  
24  
25  
26  
27  
28  
29  
30  
31  
32  
33  
34  
35  
36  
37  
38  
39  
40  
41  
42  
43  
44  
45  
46  
47  
48  
49  
50  
51  
52  
53  
54  
55  
56  
57  
58  
59  
60

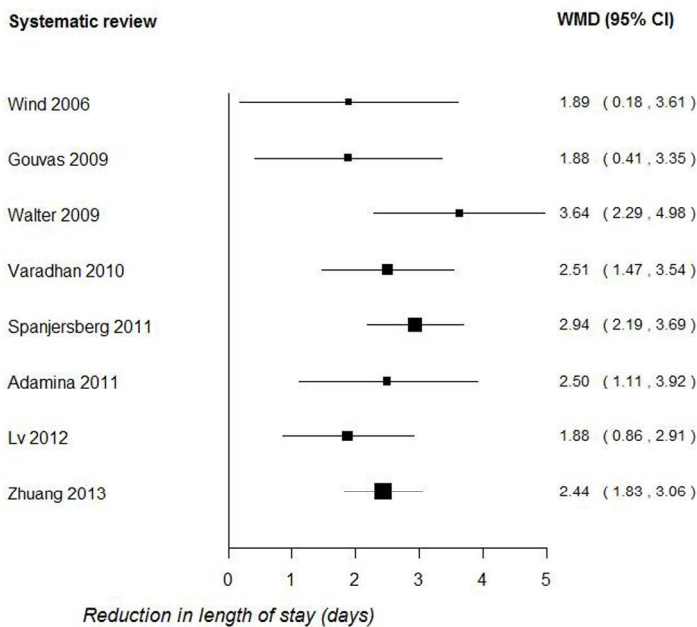

Summary of pooled results for primary length of stay  
245x202mm (300 x 300 DPI)

Peer Review Only
